# Supplementary material for: White Matter Electric Field Maximization Guided Coil Orientation Optimization for rTMS in Alzheimer's Disease
Source: Research Square preprint supplement (doi:10.21203/rs.3.rs-7319128/v1), 2025-09-05
Supplement: Supplementary file 1 [file 428fb3ff04393b7ba4768f0d.docx]

**eMethods**

Supplement 1

Participants were assigned to either the DLPFC or AG group based on the following inclusion criteria: (i) all participants met the probable Alzheimer's disease dementia diagnosis according to the 2011 NIA-AA guidelines, characterized by an insidious onset, progressive cognitive decline, primary deficits in amnestic or non-amnestic domains (language, visuospatial, executive), and absence of other neurological disorders or significant medical conditions affecting cognition; (ii) right-handed male or female patients aged 55–80 years; (iii) Clinical Dementia Rating (CDR) point of 0.5 or 1.0; (iv) Mini-Mental State Examination (MMSE) ≤27; and (v) stable donepezil dosage for at least three months prior to and during the aiTBS intervention. Exclusion Criteria include: (i) presence of non-AD pathologies, other neurological or severe systemic diseases; (ii) history of seizures or first-degree relatives with seizures; (iii) current benzodiazepine use or substance abuse history; (iv) focal brain lesions on MRI (T1 or T2); and (v) non-MRI compatible metallic implants (e.g., pacemakers, deep brain stimulators). This study was approved by the Medical Research Ethics Committee of Xuanwu Hospital, and all patients provided signed informed consent forms.

Cognitive assessments of each patient were performed before and after treatment. All patients completed the MMSE and Montreal Cognitive Assessment (MoCA). For the DLPFC group, the Geriatric Depression Scale (GDS), Face-word Stroop Task and Auditory Verbal Learning Test (AVLT) were performed. We define AVLT_all as the sum of the scores for AVLT1, AVLT2, and AVLT3. All clinical assessments were performed by a single rater who was blinded to the treatment sessions.

Supplement 2

For the DLPFC group, the main parameters for magnetization-prepared rapid gradient echo (MPRAGE) images were: repetition time (TR) = 2530 ms, echo time (TE) = 2.98 ms, inversion time (TI) =1100 ms, flip angle (FA) = 7°, matrix size = 256 × 256, slices = 192, voxel size = 1 × 1 × 1 mm3. For the AG group, the main parameters for MPRAGE images were: TR = 1900 ms, TE = 2.20 ms, TI = 900 ms, FA = 9°, matrix size = 256 × 256, slices = 176, voxel size = 1 × 1 × 1 mm3.

Supplement 3

For the DLPFC group, the stimulation target was the left DLPFC. Participants received accelerated intermittent theta-burst stimulation (aiTBS) for 2 weeks, consisting of a total of 28 sessions (two sessions per day, spaced approximately 50 minutes apart), delivering 50,400 pulses in total. Each aiTBS session consisted of 1,800 pulses in 60 triplet bursts, with a train duration of 2 seconds, a cycle period of 8 seconds, and an intensity of 80% of the resting motor threshold (rMT). All rMTs were clinically measured at Xuanwu Hospital, providing accurate and individualized components for the simulation.

For the AG group, the stimulation target was the bilateral AG. All patients received treatment three times a week for four consecutive weeks, totaling 12 sessions. Each session involved sequential stimulation of the targets for 15 minutes each. The rTMS frequency was set to 40 Hz, with an intensity of 40% of the maximum stimulator output. Each pulse train lasted 2 seconds, with an inter-train interval of 58 seconds. Each AG received 15 pulse trains, totaling 1,200 pulses per target.

Supplement 4

The MRI T1 data of all patients were segmented using the "mri2mesh" command in SimNIBS software (v3.2.5, www.simnibs.org) to create a realistic brain model for simulating the distribution of the E-field within the brain. The model includes the scalp, skull, cerebrospinal fluid (CSF), GM, and WM, with the conductivity of each layer set as follows: scalp 0.465 S/m, skull 0.010 S/m, CSF 1.654 S/m, GM 0.275 S/m, and WM 0.126 S/m.

**eResults**

Supplement 1

In the PC region, all patients achieved EGM maxima at 30° or 60°, with 57.78% occurring at 30° and 42.22% at 60°.

Supplement 2

The demographic information of the participants is presented in Table S5. For the DLPFC group, the following scale scores after treatment showed a significant increase compared to before treatment: MMSE, MoCA, Face-word Stroop Task, AVLT1, AVLT2, AVLT3, AVLT_delay, AVLT_clue, AVLT_recognition and AVLT_all (all *P* < 0.05). In the AG group, the following scale scores showed a significant increase after treatment: MMSE, MoCA and ADAS-Cog score (all *P* < 0.05).

Table S1. The voxel counts and CVs across brain regions

| Brain regions | Mean ± SD (CV%) | | *t* | *P* |
| --- | --- | --- | --- | --- |
| GM | WM |
| M1 | 762.11 ± 252.16 (33.09) | 207.00 ± 156.11 (75.42) | 12.56 | < 0.001 |
| left DLPFC | 1084.56 ± 408.84 (36.76) | 319.18 ± 243.67 (75.89) | 10.79 | < 0.001 |
| left AG | 1069.13 ± 358.12 (33.50) | 328.40 ± 227.12 (69.16) | 11.72 | < 0.001 |
| PC | 893.16 ± 285.28 (31.94) | 238.36 ± 150.28 (63.05) | 13.62 | < 0.001 |

Table S2. E-field values and CVs across different brain regions at the initial orientation

| Mean ± SD (0°) | | | | | |
| --- | --- | --- | --- | --- | --- |
| Brain regions | E⊥ | E*∥* | EWM | EGM | EROI |
| M1 | 0.41 ± 0.050 | 0.46 ± 0.079 | 0.86 ± 0.091 | 0.70 ± 0.077 | 0.76 ± 0.074 |
| left DLPFC | 0.32 ± 0.061 | 0.45 ± 0.078 | 0.75 ± 0.12 | 0.62 ± 0.084 | 0.66 ± 0.088 |
| left AG | 0.27 ± 0.055 | 0.36 ± 0.060 | 0.64 ± 0.11 | 0.52 ± 0.079 | 0.57 ± 0.094 |
| PC | 0.13 ± 0.033 | 0.17 ± 0.039 | 0.32 ± 0.076 | 0.23 ± 0.054 | 0.26 ± 0.059 |
| CV (%) | | | | | |
| M1 | 12.31 | 17.08 | 10.55 | 10.98 | 9.77 |
| left DLPFC | 18.99 | 17.50 | 16.29 | 13.55 | 13.41 |
| left AG | 20.39 | 16.41 | 17.23 | 15.20 | 16.43 |
| PC | 26.11 | 22.85 | 23.66 | 23.37 | 23.19 |

Table S3. E-field values and CVs across coil orientation

| Mean ± SD (-60°) | | | | | |
| --- | --- | --- | --- | --- | --- |
| Brain regions | E⊥ | E*∥* | EWM | EGM | EROI |
| M1 | 0.33 ± 0.067 | 0.48 ± 0.080 | 0.73 ± 0.103 | 0.66 ± 0.085 | 0.69 ± 0.088 |
| left DLPFC | 0.33 ± 0.063 | 0.44 ± 0.084 | 0.76 ± 0.121 | 0.62 ± 0.083 | 0.66 ± 0.089 |
| left AG | 0.24 ± 0.054 | 0.36 ± 0.059 | 0.59 ± 0.101 | 0.50 ± 0.079 | 0.54 ± 0.089 |
| PC | 0.11 ± 0.029 | 0.14 ± 0.037 | 0.28 ± 0.071 | 0.18 ± 0.048 | 0.21 ± 0.053 |
| Mean ± SD (-30°) | | | | | |
| M1 | 0.38 ± 0.064 | 0.47 ± 0.074 | 0.81 ± 0.102 | 0.69 ± 0.078 | 0.73 ± 0.081 |
| left DLPFC | 0.33 ± 0.057 | 0.44 ± 0.079 | 0.78 ± 0.110 | 0.62 ± 0.082 | 0.66 ± 0.087 |
| left AG | 0.24 ± 0.056 | 0.38 ± 0.059 | 0.62 ± 0.107 | 0.51 ± 0.079 | 0.56 ± 0.092 |
| PC | 0.11 ± 0.030 | 0.14 ± 0.038 | 0.29 ± 0.073 | 0.19 ± 0.051 | 0.22 ± 0.056 |
| Mean ± SD (30°) | | | | | |
| M1 | 0.37 ± 0.057 | 0.48 ± 0.083 | 0.82 ± 0.102 | 0.68 ± 0.085 | 0.73 ± 0.084 |
| left DLPFC | 0.32 ± 0.064 | 0.45 ± 0.086 | 0.71 ± 0.141 | 0.62 ± 0.091 | 0.64 ± 0.096 |
| left AG | 0.31 ± 0.052 | 0.31 ± 0.063 | 0.65 ± 0.107 | 0.51 ± 0.076 | 0.58 ± 0.090 |
| PC | 0.15 ± 0.038 | 0.19 ± 0.041 | 0.36 ± 0.081 | 0.27 ± 0.059 | 0.29 ± 0.065 |
| Mean ± SD (60°) | | | | | |
| M1 | 0.31 ± 0.068 | 0.49 ± 0.087 | 0.74 ± 0.115 | 0.66 ± 0.091 | 0.69 ± 0.093 |
| left DLPFC | 0.31 ± 0.065 | 0.44 ± 0.088 | 0.70 ± 0.130 | 0.61 ± 0.092 | 0.64 ± 0.095 |
| left AG | 0.31 ± 0.046 | 0.27 ± 0.061 | 0.63 ± 0.092 | 0.49 ± 0.075 | 0.55 ± 0.083 |
| PC | 0.15 ± 0.036 | 0.19 ± 0.042 | 0.35 ± 0.078 | 0.26 ± 0.058 | 0.29 ± 0.063 |
| Mean ± SD (90°) | | | | | |
| M1 | 0.29 ± 0.062 | 0.50 ± 0.084 | 0.69 ± 0.110 | 0.65 ± 0.091 | 0.66 ± 0.093 |
| left DLPFC | 0.32 ± 0.058 | 0.44 ± 0.087 | 0.72 ± 0.114 | 0.61 ± 0.087 | 0.64 ± 0.089 |
| left AG | 0.28 ± 0.047 | 0.31 ± 0.059 | 0.59 ± 0.092 | 0.49 ± 0.077 | 0.53 ± 0.084 |
| PC | 0.13 ± 0.031 | 0.17 ± 0.041 | 0.32 ± 0.074 | 0.23 ± 0.054 | 0.25 ± 0.058 |
| CV (%) | | | | | |
| M1 | 19.49 | 7.29 | 11.83 | 5.06 | 7.66 |
| left DLPFC | 14.51 | 6.69 | 11.32 | 4.36 | 5.98 |
| left AG | 14.78 | 15.09 | 7.25 | 3.64 | 4.99 |
| PC | 14.55 | 13.81 | 11.26 | 16.05 | 14.06 |

Table S4. The occurrence of frequency of sOCO for E⊥ and EWM values across different coil orientations

| E⊥ | | | | | | | | | | | | | |
| --- | --- | --- | --- | --- | --- | --- | --- | --- | --- | --- | --- | --- | --- |
| Brain regions | | -60° | | -30° | | 0° | 30° | | 60° | 90° | | Optimal coil orientation (patients%) | |
| M1 | | 2 | | 12 | | 22 | 5 | | 4 | 0 | | -30°~30° (86.67) | |
| left DLPFC | | 9 | | 14 | | 7 | 5 | | 4 | 6 | | **/** | |
| left AG | | 1 | | 1 | | 0 | 20 | | 20 | 3 | | 30°~60° (88.89) | |
| PC | | 0 | | 0 | | 2 | 20 | | 20 | 3 | | 30°~60° (88.89) | |
| EWM | | | | | | | | | | | | | |
| M1 | | 3 | | 9 | | 23 | 7 | | 2 | 1 | | -30°~30° (86.67) | |
| left DLPFC | | 12 | | 15 | | 5 | 6 | | 3 | 4 | | / | |
| left AG | | 0 | | 4 | | 12 | 19 | | 8 | 2 | | 0°~60° (86.67) | |
| PC | | 0 | | 0 | | 0 | 25 | | 16 | 4 | | 30°~60° (91.11) | |
| E-field distribution at various coil orientations | | | | | | | | | | | | | |
| E⊥ in M1 | | | | | | | | | | | | | |
|  | -60° | | -30° | | 0° | | | 30° | | | 60° | | 90° |
| sub1 | 0.290774 | | 0.444378 | | 0.491948003 | | | 0.414034 | | | 0.25203 | | 0.1815355 |
| sub2 | 0.375725 | | 0.432547 | | 0.401681731 | | | 0.31585 | | | 0.255001 | | 0.2786175 |
| sub3 | 0.372246 | | 0.475534 | | 0.443800556 | | | 0.34004 | | | 0.226806 | | 0.2298694 |
| sub4 | 0.277861 | | 0.376879 | | 0.430242728 | | | 0.409988 | | | 0.341335 | | 0.2569569 |
| sub5 | 0.380331 | | 0.414204 | | 0.416353931 | | | 0.399122 | | | 0.369867 | | 0.3540793 |
| sub6 | 0.33799 | | 0.363631 | | 0.398872163 | | | 0.371329 | | | 0.325395 | | 0.318819 |
| sub7 | 0.355646 | | 0.38226 | | 0.400363168 | | | 0.391174 | | | 0.355192 | | 0.334763 |
| sub8 | 0.270718 | | 0.441577 | | 0.528016667 | | | 0.497655 | | | 0.38777 | | 0.2543073 |
| sub9 | 0.207856 | | 0.332024 | | 0.406117129 | | | 0.374439 | | | 0.305895 | | 0.2227338 |
| sub10 | 0.393477 | | 0.467159 | | 0.465692185 | | | 0.3648 | | | 0.260651 | | 0.2903281 |
| sub11 | 0.3722 | | 0.48501 | | 0.461278474 | | | 0.335813 | | | 0.230029 | | 0.2498135 |
| sub12 | 0.303422 | | 0.350812 | | 0.403786405 | | | 0.40789 | | | 0.377197 | | 0.3266646 |
| sub13 | 0.352585 | | 0.3122 | | 0.377108353 | | | 0.450061 | | | 0.482369 | | 0.4385297 |
| sub14 | 0.321113 | | 0.371754 | | 0.399229825 | | | 0.400564 | | | 0.383559 | | 0.3463252 |
| sub15 | 0.301435 | | 0.377583 | | 0.416924427 | | | 0.407734 | | | 0.343225 | | 0.2722759 |
| sub16 | 0.190046 | | 0.307422 | | 0.418607634 | | | 0.446856 | | | 0.398592 | | 0.2817615 |
| sub17 | 0.214951 | | 0.236942 | | 0.313646169 | | | 0.37558 | | | 0.392969 | | 0.3375988 |
| sub18 | 0.396964 | | 0.411044 | | 0.399233346 | | | 0.366546 | | | 0.324231 | | 0.3414727 |
| sub19 | 0.324694 | | 0.377938 | | 0.387073127 | | | 0.384786 | | | 0.367046 | | 0.3265854 |
| sub20 | 0.252226 | | 0.350011 | | 0.34005731 | | | 0.261812 | | | 0.168949 | | 0.1480105 |
| sub21 | 0.329281 | | 0.426614 | | 0.461910472 | | | 0.444354 | | | 0.383102 | | 0.2808904 |
| sub22 | 0.166694 | | 0.299091 | | 0.432048892 | | | 0.457835 | | | 0.396185 | | 0.2643398 |
| sub23 | 0.281892 | | 0.315706 | | 0.359758011 | | | 0.386379 | | | 0.389807 | | 0.3487234 |
| sub24 | 0.357854 | | 0.430036 | | 0.478352212 | | | 0.406487 | | | 0.280882 | | 0.2939619 |
| sub25 | 0.330336 | | 0.446132 | | 0.468811195 | | | 0.396972 | | | 0.298623 | | 0.2715371 |
| sub26 | 0.411964 | | 0.26021 | | 0.466592743 | | | 0.437059 | | | 0.350496 | | 0.2182805 |
| sub27 | 0.328696 | | 0.3685 | | 0.416731596 | | | 0.407011 | | | 0.365244 | | 0.3464531 |
| sub28 | 0.338144 | | 0.433816 | | 0.464404894 | | | 0.419541 | | | 0.330652 | | 0.2822594 |
| sub29 | 0.352118 | | 0.370005 | | 0.406497977 | | | 0.420572 | | | 0.425013 | | 0.3884225 |
| sub30 | 0.281747 | | 0.400304 | | 0.426812552 | | | 0.362363 | | | 0.266115 | | 0.2395014 |
| sub31 | 0.250769 | | 0.2752 | | 0.29694 | | | 0.298488 | | | 0.280106 | | 0.2522336 |
| sub32 | 0.41691 | | 0.422779 | | 0.395665812 | | | 0.330549 | | | 0.315457 | | 0.3649549 |
| sub33 | 0.332266 | | 0.380075 | | 0.402251065 | | | 0.377457 | | | 0.321067 | | 0.2517095 |
| sub34 | 0.392055 | | 0.372739 | | 0.343419153 | | | 0.307603 | | | 0.319419 | | 0.3566924 |
| sub35 | 0.243926 | | 0.318125 | | 0.421188966 | | | 0.420123 | | | 0.346037 | | 0.2441403 |
| sub36 | 0.294018 | | 0.316003 | | 0.331282913 | | | 0.326638 | | | 0.310445 | | 0.2847344 |
| sub37 | 0.427418 | | 0.436275 | | 0.36801641 | | | 0.281607 | | | 0.28133 | | 0.3512575 |
| sub38 | 0.471096 | | 0.505687 | | 0.399302537 | | | 0.218193 | | | 0.175739 | | 0.3586839 |
| sub39 | 0.271148 | | 0.377041 | | 0.375322423 | | | 0.30253 | | | 0.225571 | | 0.1791744 |
| sub40 | 0.384516 | | 0.419178 | | 0.392389929 | | | 0.317956 | | | 0.213775 | | 0.2937306 |
| sub41 | 0.413603 | | 0.455985 | | 0.422535783 | | | 0.334518 | | | 0.25712 | | 0.3234612 |
| sub42 | 0.251586 | | 0.365506 | | 0.375450547 | | | 0.318364 | | | 0.259503 | | 0.2245 |
| sub43 | 0.343897 | | 0.479951 | | 0.49657191 | | | 0.406789 | | | 0.227645 | | 0.2036824 |
| sub44 | 0.358375 | | 0.351996 | | 0.306321206 | | | 0.294623 | | | 0.293058 | | 0.331004 |
| sub45 | 0.288126 | | 0.288126 | | 0.427469649 | | | 0.369057 | | | 0.267801 | | 0.1961772 |
| E*∥* in M1 | | | | | | | | | | | | | |
| sub1 | 0.467733 | | 0.43124 | | 0.434804053 | | | 0.436936 | | | 0.462965 | | 0.482833 |
| sub2 | 0.626335 | | 0.632971 | | 0.600779765 | | | 0.565677 | | | 0.577286 | | 0.604504 |
| sub3 | 0.627477 | | 0.621745 | | 0.556921061 | | | 0.508992 | | | 0.515385 | | 0.565471 |
| sub4 | 0.593706 | | 0.529012 | | 0.450960425 | | | 0.4506 | | | 0.524881 | | 0.587652 |
| sub5 | 0.495815 | | 0.467964 | | 0.512020763 | | | 0.56519 | | | 0.586027 | | 0.556611 |
| sub6 | 0.504475 | | 0.560323 | | 0.558509951 | | | 0.532572 | | | 0.498388 | | 0.469893 |
| sub7 | 0.401434 | | 0.397505 | | 0.367111776 | | | 0.382003 | | | 0.397026 | | 0.400577 |
| sub8 | 0.622098 | | 0.571815 | | 0.538784554 | | | 0.568486 | | | 0.615957 | | 0.636107 |
| sub9 | 0.410036 | | 0.428914 | | 0.431263287 | | | 0.425348 | | | 0.412028 | | 0.398115 |
| sub10 | 0.474761 | | 0.414582 | | 0.466857315 | | | 0.521388 | | | 0.540746 | | 0.526346 |
| sub11 | 0.500353 | | 0.483682 | | 0.470492026 | | | 0.477543 | | | 0.49693 | | 0.508543 |
| sub12 | 0.447052 | | 0.422115 | | 0.377224543 | | | 0.392507 | | | 0.416019 | | 0.437829 |
| sub13 | 0.414452 | | 0.427382 | | 0.426137457 | | | 0.41803 | | | 0.42868 | | 0.42677 |
| sub14 | 0.539113 | | 0.538236 | | 0.519202806 | | | 0.517861 | | | 0.52135 | | 0.528333 |
| sub15 | 0.558594 | | 0.556478 | | 0.556952639 | | | 0.549603 | | | 0.549591 | | 0.554226 |
| sub16 | 0.63833 | | 0.588337 | | 0.492956333 | | | 0.46305 | | | 0.539876 | | 0.616077 |
| sub17 | 0.401776 | | 0.411606 | | 0.372990905 | | | 0.298365 | | | 0.249261 | | 0.328693 |
| sub18 | 0.395141 | | 0.427011 | | 0.525169099 | | | 0.582782 | | | 0.566243 | | 0.476703 |
| sub19 | 0.492589 | | 0.524901 | | 0.552870898 | | | 0.565697 | | | 0.550509 | | 0.506148 |
| sub20 | 0.288624 | | 0.277165 | | 0.257613459 | | | 0.262156 | | | 0.281301 | | 0.290444 |
| sub21 | 0.455839 | | 0.397572 | | 0.402559889 | | | 0.454838 | | | 0.493718 | | 0.492072 |
| sub22 | 0.490523 | | 0.463665 | | 0.433854904 | | | 0.429829 | | | 0.43374 | | 0.461586 |
| sub23 | 0.413489 | | 0.436475 | | 0.413027058 | | | 0.369476 | | | 0.35485 | | 0.378136 |
| sub24 | 0.527887 | | 0.471671 | | 0.512784534 | | | 0.55335 | | | 0.579935 | | 0.579878 |
| sub25 | 0.59372 | | 0.520608 | | 0.503559292 | | | 0.540588 | | | 0.615856 | | 0.641626 |
| sub26 | 0.390701 | | 0.435548 | | 0.36168038 | | | 0.385651 | | | 0.42332 | | 0.444302 |
| sub27 | 0.53155 | | 0.536801 | | 0.536841143 | | | 0.528253 | | | 0.523892 | | 0.52468 |
| sub28 | 0.398757 | | 0.440427 | | 0.453460095 | | | 0.434863 | | | 0.393852 | | 0.370062 |
| sub29 | 0.520747 | | 0.468386 | | 0.460505427 | | | 0.498289 | | | 0.532051 | | 0.543117 |
| sub30 | 0.512884 | | 0.534938 | | 0.587444111 | | | 0.607757 | | | 0.592764 | | 0.545885 |
| sub31 | 0.537928 | | 0.526605 | | 0.505680869 | | | 0.53415 | | | 0.560836 | | 0.558762 |
| sub32 | 0.439453 | | 0.453225 | | 0.452044768 | | | 0.450313 | | | 0.432 | | 0.417673 |
| sub33 | 0.557211 | | 0.479451 | | 0.494786834 | | | 0.564032 | | | 0.615781 | | 0.628578 |
| sub34 | 0.46105 | | 0.466372 | | 0.48453672 | | | 0.516134 | | | 0.504904 | | 0.469407 |
| sub35 | 0.483769 | | 0.440638 | | 0.396031891 | | | 0.416509 | | | 0.462858 | | 0.504008 |
| sub36 | 0.403433 | | 0.389213 | | 0.374878065 | | | 0.366244 | | | 0.371317 | | 0.38894 |
| sub37 | 0.501725 | | 0.50973 | | 0.561366099 | | | 0.589079 | | | 0.577873 | | 0.532077 |
| sub38 | 0.447633 | | 0.444933 | | 0.497495731 | | | 0.525919 | | | 0.527479 | | 0.491373 |
| sub39 | 0.426686 | | 0.362139 | | 0.361786818 | | | 0.408785 | | | 0.456043 | | 0.468641 |
| sub40 | 0.520105 | | 0.478577 | | 0.51033696 | | | 0.559136 | | | 0.592525 | | 0.573267 |
| sub41 | 0.331645 | | 0.317727 | | 0.351678411 | | | 0.392078 | | | 0.407449 | | 0.378337 |
| sub42 | 0.48602 | | 0.466193 | | 0.508895284 | | | 0.549297 | | | 0.570627 | | 0.54835 |
| sub43 | 0.478526 | | 0.400325 | | 0.351571755 | | | 0.37982 | | | 0.466191 | | 0.505988 |
| sub44 | 0.570271 | | 0.528069 | | 0.494885698 | | | 0.523562 | | | 0.564986 | | 0.586002 |
| sub45 | 0.396936 | | 0.396936 | | 0.306606993 | | | 0.375034 | | | 0.441932 | | 0.449245 |
| EWM in M1 | | | | | | | | | | | | | |
| sub1 | 0.687197 | | 0.92324 | | 0.992550065 | | | 0.874445 | | | 0.646088 | | 0.515817 |
| sub2 | 0.866441 | | 0.949885 | | 0.877539265 | | | 0.731806 | | | 0.63601 | | 0.699219 |
| sub3 | 0.772083 | | 0.931011 | | 0.910198781 | | | 0.773016 | | | 0.62194 | | 0.598443 |
| sub4 | 0.691631 | | 0.767926 | | 0.928159138 | | | 0.822865 | | | 0.735358 | | 0.697676 |
| sub5 | 0.923837 | | 0.973408 | | 0.959070187 | | | 0.927037 | | | 0.885001 | | 0.872004 |
| sub6 | 0.686053 | | 0.767577 | | 0.832934003 | | | 0.797401 | | | 0.694211 | | 0.646603 |
| sub7 | 0.749479 | | 0.789844 | | 0.802862597 | | | 0.78629 | | | 0.741284 | | 0.71641 |
| sub8 | 0.771006 | | 0.959097 | | 1.040212337 | | | 0.991224 | | | 0.847932 | | 0.712311 |
| sub9 | 0.565508 | | 0.689122 | | 0.761524602 | | | 0.71574 | | | 0.628807 | | 0.559473 |
| sub10 | 0.784269 | | 0.901154 | | 0.922870356 | | | 0.799036 | | | 0.653382 | | 0.673509 |
| sub11 | 0.818151 | | 0.943842 | | 0.921113946 | | | 0.790118 | | | 0.665428 | | 0.679459 |
| sub12 | 0.660671 | | 0.805908 | | 0.910990569 | | | 0.915081 | | | 0.84103 | | 0.712534 |
| sub13 | 0.763746 | | 0.745926 | | 0.915447397 | | | 1.037722 | | | 1.033563 | | 0.918803 |
| sub14 | 0.863359 | | 0.841836 | | 0.815330065 | | | 0.812767 | | | 0.830497 | | 0.851315 |
| sub15 | 0.839066 | | 0.922556 | | 0.959403187 | | | 0.93732 | | | 0.861201 | | 0.795091 |
| sub16 | 0.657438 | | 0.805702 | | 0.964603403 | | | 0.991726 | | | 0.892134 | | 0.730355 |
| sub17 | 0.63617 | | 0.660151 | | 0.73393111 | | | 0.814904 | | | 0.837206 | | 0.753431 |
| sub18 | 0.785294 | | 0.811222 | | 0.860415086 | | | 0.850447 | | | 0.803711 | | 0.779819 |
| sub19 | 0.744444 | | 0.817166 | | 0.888536776 | | | 0.904296 | | | 0.863232 | | 0.77742 |
| sub20 | 0.601426 | | 0.796147 | | 0.765993576 | | | 0.590752 | | | 0.400736 | | 0.380226 |
| sub21 | 0.642479 | | 0.849235 | | 0.989963462 | | | 0.979687 | | | 0.858435 | | 0.678579 |
| sub22 | 0.478959 | | 0.664498 | | 0.856692033 | | | 0.893672 | | | 0.792223 | | 0.599055 |
| sub23 | 0.687556 | | 0.713559 | | 0.802579886 | | | 0.861355 | | | 0.871253 | | 0.79638 |
| sub24 | 0.818584 | | 0.954588 | | 1.005860484 | | | 0.921743 | | | 0.784676 | | 0.740147 |
| sub25 | 0.859163 | | 0.958209 | | 0.973468842 | | | 0.894533 | | | 0.796642 | | 0.786003 |
| sub26 | 0.828327 | | 0.608396 | | 0.915113817 | | | 0.867986 | | | 0.730776 | | 0.569052 |
| sub27 | 0.748952 | | 0.843561 | | 0.901324389 | | | 0.885492 | | | 0.814622 | | 0.747326 |
| sub28 | 0.668258 | | 0.887232 | | 0.984884714 | | | 0.926851 | | | 0.741363 | | 0.576348 |
| sub29 | 0.90576 | | 0.877698 | | 0.868099132 | | | 0.897161 | | | 0.925487 | | 0.926599 |
| sub30 | 0.632791 | | 0.797717 | | 0.915662919 | | | 0.890882 | | | 0.754739 | | 0.626333 |
| sub31 | 0.641653 | | 0.716815 | | 0.80431994 | | | 0.801091 | | | 0.735277 | | 0.656948 |
| sub32 | 0.777259 | | 0.83136 | | 0.835514401 | | | 0.756572 | | | 0.686279 | | 0.720094 |
| sub33 | 0.739433 | | 0.749576 | | 0.795758578 | | | 0.830543 | | | 0.826736 | | 0.775635 |
| sub34 | 0.785014 | | 0.77947 | | 0.771229683 | | | 0.741952 | | | 0.730322 | | 0.756401 |
| sub35 | 0.648853 | | 0.74281 | | 0.837133004 | | | 0.821706 | | | 0.735673 | | 0.633602 |
| sub36 | 0.584271 | | 0.6262 | | 0.667268333 | | | 0.681966 | | | 0.655785 | | 0.59843 |
| sub37 | 0.809809 | | 0.851364 | | 0.807225972 | | | 0.722046 | | | 0.67835 | | 0.717283 |
| sub38 | 0.877165 | | 0.934109 | | 0.816607934 | | | 0.630814 | | | 0.569765 | | 0.736184 |
| sub39 | 0.616869 | | 0.724093 | | 0.723898708 | | | 0.649124 | | | 0.558013 | | 0.523923 |
| sub40 | 0.843025 | | 0.867337 | | 0.827843269 | | | 0.761718 | | | 0.703798 | | 0.76471 |
| sub41 | 0.680643 | | 0.744965 | | 0.766412953 | | | 0.721446 | | | 0.630885 | | 0.62756 |
| sub42 | 0.576911 | | 0.689654 | | 0.762118337 | | | 0.748785 | | | 0.68038 | | 0.5902 |
| sub43 | 0.677575 | | 0.841311 | | 0.878356375 | | | 0.791373 | | | 0.612155 | | 0.555204 |
| sub44 | 0.774895 | | 0.728073 | | 0.670173564 | | | 0.665316 | | | 0.713988 | | 0.773424 |
| sub45 | 0.597632 | | 0.597632 | | 0.763967936 | | | 0.747686 | | | 0.670075 | | 0.582186 |
| EGM in M1 | | | | | | | | | | | | | |
| sub1 | 0.621976 | | 0.70306 | | 0.715603677 | | | 0.659941 | | | 0.582226 | | 0.556097 |
| sub2 | 0.732152 | | 0.759158 | | 0.728753043 | | | 0.674568 | | | 0.641259 | | 0.668141 |
| sub3 | 0.676877 | | 0.711486 | | 0.706728325 | | | 0.674826 | | | 0.639837 | | 0.636684 |
| sub4 | 0.668191 | | 0.716055 | | 0.766327951 | | | 0.780207 | | | 0.751379 | | 0.69279 |
| sub5 | 0.772504 | | 0.797296 | | 0.798895968 | | | 0.792835 | | | 0.773874 | | 0.755765 |
| sub6 | 0.606002 | | 0.629351 | | 0.64144162 | | | 0.629006 | | | 0.597726 | | 0.584804 |
| sub7 | 0.636948 | | 0.662337 | | 0.661688819 | | | 0.645079 | | | 0.616228 | | 0.604781 |
| sub8 | 0.718498 | | 0.767084 | | 0.777541936 | | | 0.755998 | | | 0.715386 | | 0.688324 |
| sub9 | 0.563735 | | 0.618102 | | 0.644332484 | | | 0.624808 | | | 0.58727 | | 0.556396 |
| sub10 | 0.623805 | | 0.664943 | | 0.626272833 | | | 0.549053 | | | 0.510683 | | 0.548668 |
| sub11 | 0.717382 | | 0.758184 | | 0.753138622 | | | 0.713357 | | | 0.671682 | | 0.670879 |
| sub12 | 0.655468 | | 0.683445 | | 0.709333726 | | | 0.713582 | | | 0.698297 | | 0.66998 |
| sub13 | 0.70391 | | 0.723983 | | 0.776472205 | | | 0.796959 | | | 0.781565 | | 0.741998 |
| sub14 | 0.775048 | | 0.78304 | | 0.764078179 | | | 0.745497 | | | 0.738371 | | 0.748166 |
| sub15 | 0.772493 | | 0.782571 | | 0.796955591 | | | 0.805654 | | | 0.798383 | | 0.779232 |
| sub16 | 0.709078 | | 0.736729 | | 0.761140181 | | | 0.763755 | | | 0.748693 | | 0.721596 |
| sub17 | 0.500012 | | 0.514771 | | 0.531236866 | | | 0.540579 | | | 0.532497 | | 0.509093 |
| sub18 | 0.653592 | | 0.686243 | | 0.737521596 | | | 0.750445 | | | 0.721853 | | 0.676353 |
| sub19 | 0.686257 | | 0.735222 | | 0.77880585 | | | 0.785116 | | | 0.757061 | | 0.705111 |
| sub20 | 0.415939 | | 0.46903 | | 0.451017588 | | | 0.398663 | | | 0.356374 | | 0.357283 |
| sub21 | 0.626976 | | 0.660511 | | 0.689716544 | | | 0.691261 | | | 0.670039 | | 0.636945 |
| sub22 | 0.488895 | | 0.592972 | | 0.678106853 | | | 0.676999 | | | 0.609615 | | 0.516787 |
| sub23 | 0.61792 | | 0.622306 | | 0.64041672 | | | 0.652856 | | | 0.650757 | | 0.634686 |
| sub24 | 0.718424 | | 0.755198 | | 0.773475016 | | | 0.756524 | | | 0.720307 | | 0.700424 |
| sub25 | 0.783346 | | 0.791108 | | 0.776147988 | | | 0.752688 | | | 0.743809 | | 0.760104 |
| sub26 | 0.659145 | | 0.580215 | | 0.688599885 | | | 0.667972 | | | 0.614943 | | 0.560671 |
| sub27 | 0.711224 | | 0.753459 | | 0.768361952 | | | 0.751512 | | | 0.716067 | | 0.69168 |
| sub28 | 0.589963 | | 0.673407 | | 0.692466978 | | | 0.647563 | | | 0.564345 | | 0.522245 |
| sub29 | 0.80929 | | 0.803005 | | 0.787763061 | | | 0.783839 | | | 0.788184 | | 0.797824 |
| sub30 | 0.635183 | | 0.720278 | | 0.78575082 | | | 0.771067 | | | 0.695004 | | 0.628775 |
| sub31 | 0.660932 | | 0.655683 | | 0.660901995 | | | 0.684308 | | | 0.693457 | | 0.680642 |
| sub32 | 0.67899 | | 0.679961 | | 0.644606851 | | | 0.605762 | | | 0.595648 | | 0.640999 |
| sub33 | 0.753793 | | 0.742708 | | 0.756561677 | | | 0.780606 | | | 0.792105 | | 0.780612 |
| sub34 | 0.664612 | | 0.653481 | | 0.648363959 | | | 0.653118 | | | 0.657364 | | 0.663012 |
| sub35 | 0.577032 | | 0.59558 | | 0.632154917 | | | 0.646548 | | | 0.636971 | | 0.595228 |
| sub36 | 0.56388 | | 0.573257 | | 0.566388392 | | | 0.556605 | | | 0.542158 | | 0.540433 |
| sub37 | 0.70482 | | 0.724361 | | 0.747426271 | | | 0.71562 | | | 0.689038 | | 0.692839 |
| sub38 | 0.740915 | | 0.752622 | | 0.689024944 | | | 0.6182 | | | 0.611278 | | 0.68608 |
| sub39 | 0.566008 | | 0.584184 | | 0.586196702 | | | 0.575688 | | | 0.560143 | | 0.552804 |
| sub40 | 0.723924 | | 0.733223 | | 0.725887349 | | | 0.706965 | | | 0.684547 | | 0.701411 |
| sub41 | 0.631725 | | 0.65466 | | 0.634734505 | | | 0.58914 | | | 0.553134 | | 0.583312 |
| sub42 | 0.618387 | | 0.664051 | | 0.71251774 | | | 0.717301 | | | 0.687998 | | 0.640689 |
| sub43 | 0.651609 | | 0.691394 | | 0.669051205 | | | 0.613625 | | | 0.564678 | | 0.58381 |
| sub44 | 0.787875 | | 0.741311 | | 0.692383153 | | | 0.694473 | | | 0.744386 | | 0.794907 |
| sub45 | 0.557731 | | 0.557731 | | 0.600212758 | | | 0.596462 | | | 0.573183 | | 0.547374 |
| EROI in M1 | | | | | | | | | | | | | |
| sub1 | 0.645321 | | 0.781871 | | 0.8147341 | | | 0.7367208 | | | 0.605085 | | 0.541679 |
| sub2 | 0.785569 | | 0.835025 | | 0.7879369 | | | 0.6973358 | | | 0.639171 | | 0.680503 |
| sub3 | 0.707885 | | 0.782984 | | 0.7729978 | | | 0.7068059 | | | 0.634008 | | 0.624229 |
| sub4 | 0.675882 | | 0.733075 | | 0.8194288 | | | 0.7942041 | | | 0.746122 | | 0.694393 |
| sub5 | 0.82532 | | 0.858759 | | 0.854797 | | | 0.839672 | | | 0.812657 | | 0.796332 |
| sub6 | 0.629919 | | 0.67065 | | 0.698655 | | | 0.6793182 | | | 0.626553 | | 0.603268 |
| sub7 | 0.673011 | | 0.703199 | | 0.7069303 | | | 0.6903325 | | | 0.656304 | | 0.640554 |
| sub8 | 0.735955 | | 0.830921 | | 0.8648692 | | | 0.834201 | | | 0.759452 | | 0.696299 |
| sub9 | 0.564322 | | 0.641584 | | 0.6830812 | | | 0.6548738 | | | 0.601004 | | 0.557414 |
| sub10 | 0.683814 | | 0.753279 | | 0.7371917 | | | 0.6425392 | | | 0.564048 | | 0.595355 |
| sub11 | 0.750704 | | 0.819576 | | 0.808684 | | | 0.73874 | | | 0.669614 | | 0.673716 |
| sub12 | 0.657501 | | 0.731314 | | 0.7881588 | | | 0.7923453 | | | 0.75409 | | 0.686613 |
| sub13 | 0.721594 | | 0.730468 | | 0.817545 | | | 0.8681141 | | | 0.856041 | | 0.794251 |
| sub14 | 0.807352 | | 0.804547 | | 0.7828262 | | | 0.7701042 | | | 0.772071 | | 0.785898 |
| sub15 | 0.799927 | | 0.840258 | | 0.8638993 | | | 0.859913 | | | 0.82427 | | 0.785767 |
| sub16 | 0.688304 | | 0.764477 | | 0.8429922 | | | 0.8554664 | | | 0.806398 | | 0.72512 |
| sub17 | 0.549733 | | 0.567859 | | 0.6052548 | | | 0.6407542 | | | 0.643767 | | 0.598318 |
| sub18 | 0.701591 | | 0.731793 | | 0.7823108 | | | 0.7868914 | | | 0.751687 | | 0.714062 |
| sub19 | 0.704167 | | 0.760443 | | 0.8125801 | | | 0.8217984 | | | 0.78974 | | 0.727367 |
| sub20 | 0.471578 | | 0.567152 | | 0.5454981 | | | 0.4562819 | | | 0.369681 | | 0.364165 |
| sub21 | 0.632407 | | 0.726619 | | 0.7948891 | | | 0.7922927 | | | 0.736031 | | 0.651529 |
| sub22 | 0.485346 | | 0.618519 | | 0.7418925 | | | 0.7543885 | | | 0.674837 | | 0.546171 |
| sub23 | 0.638261 | | 0.648962 | | 0.6877863 | | | 0.7137607 | | | 0.715166 | | 0.681919 |
| sub24 | 0.753382 | | 0.824788 | | 0.8545813 | | | 0.814188 | | | 0.742773 | | 0.714288 |
| sub25 | 0.808816 | | 0.847244 | | 0.8424361 | | | 0.8003397 | | | 0.761558 | | 0.768805 |
| sub26 | 0.719582 | | 0.590283 | | 0.7695183 | | | 0.7394238 | | | 0.656322 | | 0.563665 |
| sub27 | 0.725914 | | 0.788542 | | 0.8201337 | | | 0.8036802 | | | 0.754441 | | 0.713347 |
| sub28 | 0.618689 | | 0.751857 | | 0.799752 | | | 0.750031 | | | 0.629291 | | 0.542095 |
| sub29 | 0.843958 | | 0.829847 | | 0.8166328 | | | 0.8245628 | | | 0.837526 | | 0.844101 |
| sub30 | 0.633858 | | 0.763176 | | 0.8577162 | | | 0.8374393 | | | 0.728095 | | 0.627422 |
| sub31 | 0.649593 | | 0.691637 | | 0.7452536 | | | 0.7529941 | | | 0.718054 | | 0.666706 |
| sub32 | 0.718258 | | 0.740459 | | 0.7208927 | | | 0.6660248 | | | 0.631864 | | 0.672605 |
| sub33 | 0.747157 | | 0.745882 | | 0.7746747 | | | 0.803682 | | | 0.808108 | | 0.778312 |
| sub34 | 0.71729 | | 0.708604 | | 0.7021203 | | | 0.6919847 | | | 0.689285 | | 0.703872 |
| sub35 | 0.605338 | | 0.653606 | | 0.7129395 | | | 0.7155802 | | | 0.675871 | | 0.610351 |
| sub36 | 0.573824 | | 0.599077 | | 0.6155858 | | | 0.6177415 | | | 0.597572 | | 0.568717 |
| sub37 | 0.748519 | | 0.777222 | | 0.7723162 | | | 0.7182948 | | | 0.684589 | | 0.703013 |
| sub38 | 0.795513 | | 0.825348 | | 0.7401503 | | | 0.6232545 | | | 0.594643 | | 0.706158 |
| sub39 | 0.584951 | | 0.636292 | | 0.6374825 | | | 0.6030383 | | | 0.55935 | | 0.542048 |
| sub40 | 0.769716 | | 0.784787 | | 0.7650873 | | | 0.7280166 | | | 0.691949 | | 0.725748 |
| sub41 | 0.650243 | | 0.688844 | | 0.6845801 | | | 0.6392228 | | | 0.582566 | | 0.600061 |
| sub42 | 0.598253 | | 0.67648 | | 0.7365955 | | | 0.7325841 | | | 0.6843 | | 0.616179 |
| sub43 | 0.659505 | | 0.736982 | | 0.7326996 | | | 0.667677 | | | 0.579115 | | 0.575111 |
| sub44 | 0.779921 | | 0.733199 | | 0.6787739 | | | 0.6766067 | | | 0.725759 | | 0.781743 |
| sub45 | 0.579547 | | 0.579547 | | 0.6897498 | | | 0.6791478 | | | 0.626161 | | 0.566409 |
| E⊥ in left DLPFC | | | | | | | | | | | | | |
| sub1 | 0.156643 | | 0.21597 | | 0.368936674 | | | 0.443763 | | | 0.416589 | | 0.2976886 |
| sub2 | 0.418779 | | 0.408297 | | 0.31300931 | | | 0.247234 | | | 0.247974 | | 0.3407051 |
| sub3 | 0.403909 | | 0.282805 | | 0.170806941 | | | 0.249821 | | | 0.365804 | | 0.4291228 |
| sub4 | 0.290016 | | 0.324043 | | 0.352515429 | | | 0.365557 | | | 0.350691 | | 0.2970168 |
| sub5 | 0.391401 | | 0.415575 | | 0.360823413 | | | 0.265934 | | | 0.198618 | | 0.2871134 |
| sub6 | 0.345161 | | 0.381655 | | 0.360802964 | | | 0.309889 | | | 0.238474 | | 0.2569093 |
| sub7 | 0.357383 | | 0.335035 | | 0.296133877 | | | 0.293711 | | | 0.313644 | | 0.3375549 |
| sub8 | 0.409957 | | 0.408239 | | 0.316208603 | | | 0.223619 | | | 0.224272 | | 0.3215443 |
| sub9 | 0.21691 | | 0.267403 | | 0.342284031 | | | 0.40608 | | | 0.379784 | | 0.2801777 |
| sub10 | 0.360077 | | 0.364328 | | 0.356676069 | | | 0.331429 | | | 0.325829 | | 0.3420086 |
| sub11 | 0.243153 | | 0.294108 | | 0.332209963 | | | 0.315478 | | | 0.248473 | | 0.2256155 |
| sub12 | 0.293418 | | 0.267407 | | 0.300779337 | | | 0.335534 | | | 0.336598 | | 0.3150228 |
| sub13 | 0.331347 | | 0.386922 | | 0.431981699 | | | 0.419179 | | | 0.388127 | | 0.3564709 |
| sub14 | 0.328874 | | 0.348363 | | 0.338309546 | | | 0.310427 | | | 0.265427 | | 0.2746612 |
| sub15 | 0.318364 | | 0.288606 | | 0.319556483 | | | 0.363882 | | | 0.405655 | | 0.3812682 |
| sub16 | 0.3219 | | 0.330847 | | 0.267597126 | | | 0.178462 | | | 0.165698 | | 0.2501837 |
| sub17 | 0.377161 | | 0.418972 | | 0.395518676 | | | 0.327442 | | | 0.264439 | | 0.3036166 |
| sub18 | 0.316688 | | 0.209042 | | 0.206775109 | | | 0.331159 | | | 0.410932 | | 0.4059965 |
| sub19 | 0.481824 | | 0.367397 | | 0.225390182 | | | 0.237755 | | | 0.375176 | | 0.4793114 |
| sub20 | 0.267729 | | 0.231538 | | 0.242350681 | | | 0.283467 | | | 0.323217 | | 0.3233376 |
| sub21 | 0.209076 | | 0.324016 | | 0.371440145 | | | 0.368 | | | 0.32217 | | 0.2274752 |
| sub22 | 0.343152 | | 0.32374 | | 0.294812193 | | | 0.288888 | | | 0.282226 | | 0.3079691 |
| sub23 | 0.350122 | | 0.260551 | | 0.242023912 | | | 0.324812 | | | 0.400463 | | 0.4027014 |
| sub24 | 0.242048 | | 0.327153 | | 0.397756289 | | | 0.405944 | | | 0.33773 | | 0.254173 |
| sub25 | 0.346666 | | 0.429535 | | 0.475872883 | | | 0.454039 | | | 0.352975 | | 0.297656 |
| sub26 | 0.340577 | | 0.318001 | | 0.339033017 | | | 0.404452 | | | 0.432269 | | 0.4022369 |
| sub27 | 0.338544 | | 0.307289 | | 0.260825387 | | | 0.25011 | | | 0.265631 | | 0.2990432 |
| sub28 | 0.347657 | | 0.319877 | | 0.311006522 | | | 0.314994 | | | 0.314155 | | 0.3535399 |
| sub29 | 0.258411 | | 0.332669 | | 0.358573308 | | | 0.338891 | | | 0.294252 | | 0.2629194 |
| sub30 | 0.321323 | | 0.330751 | | 0.33130399 | | | 0.312143 | | | 0.292273 | | 0.2930187 |
| sub31 | 0.343852 | | 0.339565 | | 0.326111364 | | | 0.287268 | | | 0.301888 | | 0.3290292 |
| sub32 | 0.332145 | | 0.332556 | | 0.30335324 | | | 0.268071 | | | 0.262808 | | 0.3019909 |
| sub33 | 0.299761 | | 0.302808 | | 0.275258832 | | | 0.244881 | | | 0.245089 | | 0.2675244 |
| sub34 | 0.281931 | | 0.299689 | | 0.289407898 | | | 0.275896 | | | 0.254161 | | 0.2540145 |
| sub35 | 0.262892 | | 0.294717 | | 0.27711339 | | | 0.25669 | | | 0.264012 | | 0.2473768 |
| sub36 | 0.3763 | | 0.405634 | | 0.375419926 | | | 0.319463 | | | 0.286583 | | 0.3199263 |
| sub37 | 0.249448 | | 0.252646 | | 0.238289884 | | | 0.214607 | | | 0.209693 | | 0.2287437 |
| sub38 | 0.375006 | | 0.365513 | | 0.332918297 | | | 0.292753 | | | 0.288406 | | 0.3381579 |
| sub39 | 0.433151 | | 0.397718 | | 0.345621028 | | | 0.288459 | | | 0.291159 | | 0.3734174 |
| sub40 | 0.242972 | | 0.237756 | | 0.246025474 | | | 0.241512 | | | 0.241125 | | 0.2471391 |
| sub41 | 0.347387 | | 0.299363 | | 0.317387842 | | | 0.342279 | | | 0.372067 | | 0.3868636 |
| sub42 | 0.294756 | | 0.303697 | | 0.297518929 | | | 0.284893 | | | 0.263302 | | 0.2597148 |
| sub43 | 0.328492 | | 0.341812 | | 0.348024086 | | | 0.338465 | | | 0.338586 | | 0.3474209 |
| sub44 | 0.366703 | | 0.347992 | | 0.381285167 | | | 0.435312 | | | 0.433958 | | 0.3891978 |
| sub45 | 0.365612 | | 0.429938 | | 0.426475624 | | | 0.384945 | | | 0.301832 | | 0.2927042 |
| E*∥* in left DLPFC | | | | | | | | | | | | | |
| sub1 | 0.512846 | | 0.493936 | | 0.461519519 | | | 0.434815 | | | 0.463252 | | 0.505125 |
| sub2 | 0.445343 | | 0.442656 | | 0.502044852 | | | 0.534006 | | | 0.526712 | | 0.486694 |
| sub3 | 0.434 | | 0.487638 | | 0.484355003 | | | 0.443278 | | | 0.386276 | | 0.368446 |
| sub4 | 0.453951 | | 0.46099 | | 0.476603012 | | | 0.507864 | | | 0.514946 | | 0.486653 |
| sub5 | 0.433634 | | 0.40999 | | 0.493047881 | | | 0.554273 | | | 0.552723 | | 0.501883 |
| sub6 | 0.404872 | | 0.399825 | | 0.424028094 | | | 0.462009 | | | 0.455636 | | 0.421184 |
| sub7 | 0.44623 | | 0.48247 | | 0.495091352 | | | 0.479055 | | | 0.441185 | | 0.424128 |
| sub8 | 0.493467 | | 0.474575 | | 0.52018253 | | | 0.564846 | | | 0.570119 | | 0.539547 |
| sub9 | 0.50714 | | 0.476314 | | 0.421910663 | | | 0.426176 | | | 0.463925 | | 0.492782 |
| sub10 | 0.532265 | | 0.570146 | | 0.544380088 | | | 0.47703 | | | 0.448987 | | 0.477492 |
| sub11 | 0.441092 | | 0.401768 | | 0.432249836 | | | 0.469258 | | | 0.495646 | | 0.487483 |
| sub12 | 0.510923 | | 0.498919 | | 0.484686717 | | | 0.468754 | | | 0.460859 | | 0.490159 |
| sub13 | 0.491176 | | 0.52497 | | 0.5393721 | | | 0.531181 | | | 0.509288 | | 0.493276 |
| sub14 | 0.48962 | | 0.478154 | | 0.501719814 | | | 0.534773 | | | 0.543082 | | 0.516987 |
| sub15 | 0.539238 | | 0.581771 | | 0.588425523 | | | 0.556802 | | | 0.515322 | | 0.515365 |
| sub16 | 0.312274 | | 0.349675 | | 0.420988818 | | | 0.453509 | | | 0.430733 | | 0.366908 |
| sub17 | 0.624885 | | 0.599408 | | 0.635550276 | | | 0.686934 | | | 0.709401 | | 0.681631 |
| sub18 | 0.422438 | | 0.459111 | | 0.472676757 | | | 0.449549 | | | 0.410792 | | 0.399377 |
| sub19 | 0.467234 | | 0.539713 | | 0.582524052 | | | 0.565195 | | | 0.497532 | | 0.432098 |
| sub20 | 0.481921 | | 0.528737 | | 0.528412817 | | | 0.477236 | | | 0.417833 | | 0.419705 |
| sub21 | 0.459511 | | 0.448563 | | 0.410577776 | | | 0.39466 | | | 0.425145 | | 0.452674 |
| sub22 | 0.405858 | | 0.398215 | | 0.421424243 | | | 0.446583 | | | 0.448992 | | 0.426692 |
| sub23 | 0.491823 | | 0.504213 | | 0.474053749 | | | 0.437556 | | | 0.43612 | | 0.456483 |
| sub24 | 0.455789 | | 0.433749 | | 0.395341841 | | | 0.393668 | | | 0.417743 | | 0.444643 |
| sub25 | 0.611207 | | 0.55357 | | 0.576242516 | | | 0.63994 | | | 0.670514 | | 0.656126 |
| sub26 | 0.468086 | | 0.500352 | | 0.506515412 | | | 0.471757 | | | 0.433495 | | 0.430799 |
| sub27 | 0.435933 | | 0.444803 | | 0.404792385 | | | 0.356007 | | | 0.355969 | | 0.398072 |
| sub28 | 0.424708 | | 0.415295 | | 0.388381145 | | | 0.368633 | | | 0.380683 | | 0.411498 |
| sub29 | 0.453091 | | 0.458024 | | 0.441722775 | | | 0.408768 | | | 0.384303 | | 0.416994 |
| sub30 | 0.453997 | | 0.423131 | | 0.402011633 | | | 0.413513 | | | 0.432698 | | 0.459112 |
| sub31 | 0.318246 | | 0.330168 | | 0.357804976 | | | 0.358313 | | | 0.348354 | | 0.337586 |
| sub32 | 0.287088 | | 0.337054 | | 0.373700564 | | | 0.35816 | | | 0.312151 | | 0.276266 |
| sub33 | 0.296966 | | 0.321991 | | 0.339585164 | | | 0.347036 | | | 0.331565 | | 0.305071 |
| sub34 | 0.281605 | | 0.321918 | | 0.333945922 | | | 0.319676 | | | 0.288872 | | 0.257192 |
| sub35 | 0.295611 | | 0.305814 | | 0.308118008 | | | 0.308783 | | | 0.308298 | | 0.303215 |
| sub36 | 0.418076 | | 0.415054 | | 0.408355412 | | | 0.415427 | | | 0.424635 | | 0.423279 |
| sub37 | 0.25769 | | 0.276721 | | 0.298610868 | | | 0.30551 | | | 0.310315 | | 0.286595 |
| sub38 | 0.373014 | | 0.402153 | | 0.400991472 | | | 0.387301 | | | 0.37589 | | 0.368589 |
| sub39 | 0.439703 | | 0.466061 | | 0.478293697 | | | 0.47168 | | | 0.451967 | | 0.436385 |
| sub40 | 0.33249 | | 0.306142 | | 0.310695009 | | | 0.324004 | | | 0.348264 | | 0.360754 |
| sub41 | 0.396864 | | 0.41644 | | 0.432329053 | | | 0.415969 | | | 0.390818 | | 0.395866 |
| sub42 | 0.419672 | | 0.378713 | | 0.352728322 | | | 0.345467 | | | 0.367426 | | 0.402378 |
| sub43 | 0.390657 | | 0.398088 | | 0.394272291 | | | 0.380603 | | | 0.376783 | | 0.383366 |
| sub44 | 0.573512 | | 0.53585 | | 0.502642093 | | | 0.511237 | | | 0.508523 | | 0.555604 |
| sub45 | 0.478694 | | 0.48663 | | 0.453872664 | | | 0.42091 | | | 0.411238 | | 0.4408 |
| EWM in left DLPFC | | | | | | | | | | | | | |
| sub1 | 0.555024 | | 0.63669 | | 0.830303599 | | | 0.92703 | | | 0.869037 | | 0.695109 |
| sub2 | 0.91312 | | 0.925046 | | 0.813037487 | | | 0.679682 | | | 0.673238 | | 0.793118 |
| sub3 | 0.889444 | | 0.721733 | | 0.550691878 | | | 0.603145 | | | 0.767574 | | 0.900179 |
| sub4 | 0.644548 | | 0.7054 | | 0.794220939 | | | 0.824433 | | | 0.75967 | | 0.661353 |
| sub5 | 0.811935 | | 0.863402 | | 0.823562927 | | | 0.730098 | | | 0.656878 | | 0.699464 |
| sub6 | 0.788225 | | 0.908641 | | 0.873282974 | | | 0.70832 | | | 0.544595 | | 0.595562 |
| sub7 | 0.828118 | | 0.831579 | | 0.728411334 | | | 0.628022 | | | 0.629082 | | 0.732527 |
| sub8 | 0.924596 | | 0.865773 | | 0.705064568 | | | 0.601437 | | | 0.685488 | | 0.842214 |
| sub9 | 0.6214 | | 0.637319 | | 0.745104495 | | | 0.831402 | | | 0.822728 | | 0.726629 |
| sub10 | 0.906207 | | 0.864668 | | 0.75997998 | | | 0.693158 | | | 0.727691 | | 0.836078 |
| sub11 | 0.612793 | | 0.679233 | | 0.768102162 | | | 0.793784 | | | 0.736439 | | 0.652885 |
| sub12 | 0.706768 | | 0.719046 | | 0.706484574 | | | 0.680981 | | | 0.664616 | | 0.680786 |
| sub13 | 0.71732 | | 0.847275 | | 1.013462689 | | | 1.07261 | | | 0.9909 | | 0.824746 |
| sub14 | 0.78747 | | 0.780447 | | 0.730688599 | | | 0.690353 | | | 0.691724 | | 0.740475 |
| sub15 | 0.763579 | | 0.749887 | | 0.818879171 | | | 0.89957 | | | 0.919068 | | 0.855833 |
| sub16 | 0.650481 | | 0.683218 | | 0.609364522 | | | 0.488704 | | | 0.449053 | | 0.539591 |
| sub17 | 1.000454 | | 1.018079 | | 0.96800155 | | | 0.886434 | | | 0.839089 | | 0.911996 |
| sub18 | 0.747068 | | 0.638257 | | 0.632603591 | | | 0.775088 | | | 0.871159 | | 0.848737 |
| sub19 | 0.968437 | | 0.942424 | | 0.787337347 | | | 0.648615 | | | 0.692941 | | 0.85408 |
| sub20 | 0.754251 | | 0.734746 | | 0.676902813 | | | 0.635885 | | | 0.701684 | | 0.762699 |
| sub21 | 0.545111 | | 0.76551 | | 0.92215995 | | | 0.915169 | | | 0.753255 | | 0.541643 |
| sub22 | 0.765928 | | 0.709962 | | 0.66035906 | | | 0.672015 | | | 0.707517 | | 0.763993 |
| sub23 | 0.887924 | | 0.724224 | | 0.605641238 | | | 0.702507 | | | 0.87021 | | 0.946545 |
| sub24 | 0.624715 | | 0.786337 | | 0.923524841 | | | 0.92292 | | | 0.801685 | | 0.657013 |
| sub25 | 0.894953 | | 1.008262 | | 1.075014212 | | | 1.035927 | | | 0.913212 | | 0.842708 |
| sub26 | 0.747817 | | 0.82161 | | 0.873494004 | | | 0.889325 | | | 0.852122 | | 0.764592 |
| sub27 | 0.762328 | | 0.76188 | | 0.656024024 | | | 0.554034 | | | 0.545951 | | 0.65838 |
| sub28 | 0.838376 | | 0.813374 | | 0.68440604 | | | 0.57178 | | | 0.575052 | | 0.733963 |
| sub29 | 0.694177 | | 0.816604 | | 0.856933717 | | | 0.781503 | | | 0.709572 | | 0.674553 |
| sub30 | 0.746546 | | 0.736617 | | 0.679989061 | | | 0.615903 | | | 0.615889 | | 0.684237 |
| sub31 | 0.719467 | | 0.766605 | | 0.768639664 | | | 0.699571 | | | 0.666522 | | 0.678591 |
| sub32 | 0.715294 | | 0.759611 | | 0.717702079 | | | 0.630867 | | | 0.580479 | | 0.627244 |
| sub33 | 0.626847 | | 0.641175 | | 0.598943614 | | | 0.525535 | | | 0.507839 | | 0.553013 |
| sub34 | 0.650549 | | 0.724642 | | 0.701330795 | | | 0.61853 | | | 0.539549 | | 0.556534 |
| sub35 | 0.585995 | | 0.643449 | | 0.604134276 | | | 0.55482 | | | 0.574155 | | 0.52045 |
| sub36 | 0.828463 | | 0.870961 | | 0.789619352 | | | 0.660276 | | | 0.618923 | | 0.697643 |
| sub37 | 0.576982 | | 0.606802 | | 0.580614277 | | | 0.516207 | | | 0.468962 | | 0.488287 |
| sub38 | 0.757976 | | 0.761927 | | 0.69831053 | | | 0.602759 | | | 0.569099 | | 0.658574 |
| sub39 | 1.001876 | | 0.958461 | | 0.828459908 | | | 0.672474 | | | 0.667602 | | 0.845153 |
| sub40 | 0.580652 | | 0.539537 | | 0.53571509 | | | 0.557294 | | | 0.58609 | | 0.605601 |
| sub41 | 0.763185 | | 0.755989 | | 0.72511784 | | | 0.687835 | | | 0.675779 | | 0.718374 |
| sub42 | 0.719607 | | 0.679627 | | 0.62238726 | | | 0.552406 | | | 0.560558 | | 0.644327 |
| sub43 | 0.759867 | | 0.728861 | | 0.70998504 | | | 0.699197 | | | 0.70525 | | 0.749375 |
| sub44 | 0.866895 | | 0.834473 | | 0.842377381 | | | 0.894927 | | | 0.918968 | | 0.901055 |
| sub45 | 0.88746 | | 0.956815 | | 0.90667333 | | | 0.810452 | | | 0.699656 | | 0.769464 |
| EGM in left DLPFC | | | | | | | | | | | | | |
| sub1 | 0.563066 | | 0.573703 | | 0.6501749 | | | 0.704835 | | | 0.694369 | | 0.629234 |
| sub2 | 0.682921 | | 0.683148 | | 0.661223372 | | | 0.643009 | | | 0.642612 | | 0.660787 |
| sub3 | 0.64127 | | 0.596474 | | 0.5523346 | | | 0.561414 | | | 0.604774 | | 0.641723 |
| sub4 | 0.58616 | | 0.607113 | | 0.665176666 | | | 0.697609 | | | 0.677054 | | 0.623798 |
| sub5 | 0.645675 | | 0.662312 | | 0.664852956 | | | 0.648206 | | | 0.631642 | | 0.631069 |
| sub6 | 0.577115 | | 0.608874 | | 0.621274673 | | | 0.601301 | | | 0.567252 | | 0.555001 |
| sub7 | 0.652148 | | 0.663529 | | 0.645918831 | | | 0.627005 | | | 0.622369 | | 0.63143 |
| sub8 | 0.714592 | | 0.695684 | | 0.661778826 | | | 0.650198 | | | 0.668235 | | 0.698928 |
| sub9 | 0.593788 | | 0.594509 | | 0.626907217 | | | 0.653633 | | | 0.650649 | | 0.623173 |
| sub10 | 0.696532 | | 0.723552 | | 0.703101991 | | | 0.655861 | | | 0.623022 | | 0.642812 |
| sub11 | 0.55742 | | 0.566992 | | 0.603352756 | | | 0.626134 | | | 0.615771 | | 0.583395 |
| sub12 | 0.628561 | | 0.622116 | | 0.631798105 | | | 0.646221 | | | 0.649418 | | 0.641672 |
| sub13 | 0.672262 | | 0.707774 | | 0.748603057 | | | 0.759332 | | | 0.731133 | | 0.686574 |
| sub14 | 0.638791 | | 0.653814 | | 0.672671459 | | | 0.67858 | | | 0.667104 | | 0.646673 |
| sub15 | 0.703467 | | 0.702673 | | 0.725952511 | | | 0.749364 | | | 0.750034 | | 0.727323 |
| sub16 | 0.503577 | | 0.535795 | | 0.542274042 | | | 0.521823 | | | 0.494122 | | 0.481973 |
| sub17 | 0.798364 | | 0.808943 | | 0.824669271 | | | 0.825744 | | | 0.809271 | | 0.797583 |
| sub18 | 0.597888 | | 0.547293 | | 0.562214914 | | | 0.626039 | | | 0.665767 | | 0.652266 |
| sub19 | 0.733098 | | 0.700209 | | 0.661755883 | | | 0.656181 | | | 0.691064 | | 0.728876 |
| sub20 | 0.594196 | | 0.610656 | | 0.611760601 | | | 0.594208 | | | 0.584427 | | 0.586483 |
| sub21 | 0.545941 | | 0.58407 | | 0.623945556 | | | 0.625783 | | | 0.591331 | | 0.551166 |
| sub22 | 0.582012 | | 0.577843 | | 0.580033123 | | | 0.583796 | | | 0.586983 | | 0.588808 |
| sub23 | 0.67105 | | 0.620662 | | 0.596953135 | | | 0.62892 | | | 0.680259 | | 0.699561 |
| sub24 | 0.570192 | | 0.598091 | | 0.63130429 | | | 0.636961 | | | 0.611713 | | 0.579739 |
| sub25 | 0.770553 | | 0.799712 | | 0.849505289 | | | 0.865417 | | | 0.834442 | | 0.789674 |
| sub26 | 0.633928 | | 0.627451 | | 0.659590032 | | | 0.696968 | | | 0.703296 | | 0.672216 |
| sub27 | 0.601817 | | 0.591198 | | 0.533991677 | | | 0.488264 | | | 0.502883 | | 0.559715 |
| sub28 | 0.594401 | | 0.579032 | | 0.55992735 | | | 0.554863 | | | 0.569271 | | 0.590988 |
| sub29 | 0.578177 | | 0.624708 | | 0.634923124 | | | 0.597686 | | | 0.558193 | | 0.550622 |
| sub30 | 0.609214 | | 0.602148 | | 0.590287601 | | | 0.581899 | | | 0.585792 | | 0.60028 |
| sub31 | 0.556615 | | 0.57261 | | 0.569909507 | | | 0.546512 | | | 0.533507 | | 0.539618 |
| sub32 | 0.534987 | | 0.561454 | | 0.550775775 | | | 0.519656 | | | 0.492236 | | 0.497249 |
| sub33 | 0.516797 | | 0.538185 | | 0.533912094 | | | 0.511765 | | | 0.49304 | | 0.49286 |
| sub34 | 0.459919 | | 0.504852 | | 0.513531647 | | | 0.491098 | | | 0.454036 | | 0.430264 |
| sub35 | 0.482921 | | 0.499954 | | 0.495669709 | | | 0.486553 | | | 0.490275 | | 0.475483 |
| sub36 | 0.65698 | | 0.67998 | | 0.646862206 | | | 0.591398 | | | 0.573963 | | 0.603232 |
| sub37 | 0.434081 | | 0.434028 | | 0.431250301 | | | 0.427962 | | | 0.429624 | | 0.432649 |
| sub38 | 0.643347 | | 0.647465 | | 0.620132727 | | | 0.580256 | | | 0.571458 | | 0.605756 |
| sub39 | 0.734936 | | 0.738497 | | 0.695906342 | | | 0.639717 | | | 0.63298 | | 0.675121 |
| sub40 | 0.476818 | | 0.45235 | | 0.459091937 | | | 0.489832 | | | 0.512318 | | 0.511028 |
| sub41 | 0.634181 | | 0.613421 | | 0.622456477 | | | 0.64176 | | | 0.656083 | | 0.65535 |
| sub42 | 0.588404 | | 0.56976 | | 0.55040015 | | | 0.53191 | | | 0.536233 | | 0.563071 |
| sub43 | 0.601778 | | 0.597906 | | 0.58481801 | | | 0.568324 | | | 0.57136 | | 0.589977 |
| sub44 | 0.772251 | | 0.746043 | | 0.75098295 | | | 0.783965 | | | 0.803012 | | 0.798543 |
| sub45 | 0.676717 | | 0.735362 | | 0.709344461 | | | 0.651382 | | | 0.579785 | | 0.605066 |
| EROI in left DLPFC | | | | | | | | | | | | | |
| sub1 | 0.561019 | | 0.589731 | | 0.696013277 | | | 0.761378 | | | 0.738818 | | 0.645998 |
| sub2 | 0.736839 | | 0.739806 | | 0.696781517 | | | 0.651599 | | | 0.649786 | | 0.691782 |
| sub3 | 0.684364 | | 0.618224 | | 0.552049352 | | | 0.568661 | | | 0.633043 | | 0.686602 |
| sub4 | 0.593831 | | 0.620025 | | 0.682129932 | | | 0.71427 | | | 0.687908 | | 0.628732 |
| sub5 | 0.675708 | | 0.698637 | | 0.693522259 | | | 0.662999 | | | 0.636201 | | 0.643424 |
| sub6 | 0.607239 | | 0.65165 | | 0.657235088 | | | 0.616572 | | | 0.564019 | | 0.560788 |
| sub7 | 0.682041 | | 0.692076 | | 0.659932201 | | | 0.627178 | | | 0.62351 | | 0.648604 |
| sub8 | 0.757238 | | 0.730224 | | 0.670568934 | | | 0.640296 | | | 0.671739 | | 0.728025 |
| sub9 | 0.59888 | | 0.602403 | | 0.648701881 | | | 0.686412 | | | 0.682379 | | 0.642249 |
| sub10 | 0.737607 | | 0.751197 | | 0.714244376 | | | 0.663167 | | | 0.643527 | | 0.680673 |
| sub11 | 0.566409 | | 0.585213 | | 0.630096946 | | | 0.653349 | | | 0.635359 | | 0.594675 |
| sub12 | 0.64459 | | 0.641982 | | 0.647105323 | | | 0.653346 | | | 0.652533 | | 0.649688 |
| sub13 | 0.680058 | | 0.731909 | | 0.794425693 | | | 0.813532 | | | 0.776074 | | 0.710479 |
| sub14 | 0.677937 | | 0.687155 | | 0.687946933 | | | 0.68168 | | | 0.673586 | | 0.67137 |
| sub15 | 0.715469 | | 0.7121 | | 0.7445073 | | | 0.779356 | | | 0.783786 | | 0.752983 |
| sub16 | 0.530777 | | 0.563091 | | 0.554696178 | | | 0.515691 | | | 0.485777 | | 0.492641 |
| sub17 | 0.847103 | | 0.859381 | | 0.85923701 | | | 0.840381 | | | 0.816462 | | 0.825177 |
| sub18 | 0.627032 | | 0.565064 | | 0.575966344 | | | 0.655158 | | | 0.705893 | | 0.690649 |
| sub19 | 0.777099 | | 0.745496 | | 0.685236005 | | | 0.654767 | | | 0.691415 | | 0.752285 |
| sub20 | 0.625965 | | 0.635287 | | 0.624690715 | | | 0.602481 | | | 0.607701 | | 0.62146 |
| sub21 | 0.545834 | | 0.607403 | | 0.662295069 | | | 0.662997 | | | 0.612154 | | 0.549942 |
| sub22 | 0.617872 | | 0.603604 | | 0.595695307 | | | 0.600997 | | | 0.610485 | | 0.622966 |
| sub23 | 0.720238 | | 0.64415 | | 0.598923633 | | | 0.64561 | | | 0.723341 | | 0.755578 |
| sub24 | 0.579494 | | 0.630206 | | 0.681158756 | | | 0.685747 | | | 0.644123 | | 0.592923 |
| sub25 | 0.798565 | | 0.846673 | | 0.900285356 | | | 0.903813 | | | 0.852179 | | 0.801616 |
| sub26 | 0.657946 | | 0.668397 | | 0.704700149 | | | 0.737534 | | | 0.734682 | | 0.691697 |
| sub27 | 0.637884 | | 0.629551 | | 0.561412874 | | | 0.503043 | | | 0.51256 | | 0.581885 |
| sub28 | 0.635257 | | 0.618275 | | 0.580772497 | | | 0.557696 | | | 0.570239 | | 0.614931 |
| sub29 | 0.608341 | | 0.674609 | | 0.692655024 | | | 0.645486 | | | 0.597558 | | 0.582849 |
| sub30 | 0.666266 | | 0.65801 | | 0.627552216 | | | 0.596025 | | | 0.598295 | | 0.635158 |
| sub31 | 0.637195 | | 0.6686 | | 0.668242519 | | | 0.622246 | | | 0.599324 | | 0.608383 |
| sub32 | 0.606318 | | 0.639847 | | 0.616813139 | | | 0.563652 | | | 0.527146 | | 0.548676 |
| sub33 | 0.574184 | | 0.591891 | | 0.567824021 | | | 0.518946 | | | 0.500757 | | 0.524228 |
| sub34 | 0.539039 | | 0.596074 | | 0.591476748 | | | 0.543988 | | | 0.489528 | | 0.482671 |
| sub35 | 0.526123 | | 0.560098 | | 0.541131149 | | | 0.515166 | | | 0.525432 | | 0.49433 |
| sub36 | 0.743927 | | 0.776812 | | 0.719243895 | | | 0.626321 | | | 0.596759 | | 0.651101 |
| sub37 | 0.473745 | | 0.481984 | | 0.472708546 | | | 0.452456 | | | 0.440543 | | 0.448092 |
| sub38 | 0.695302 | | 0.699344 | | 0.655566306 | | | 0.590456 | | | 0.570389 | | 0.629696 |
| sub39 | 0.824574 | | 0.812361 | | 0.740417606 | | | 0.650717 | | | 0.644606 | | 0.732218 |
| sub40 | 0.509302 | | 0.479626 | | 0.483063034 | | | 0.510937 | | | 0.535397 | | 0.540615 |
| sub41 | 0.686997 | | 0.67179 | | 0.664487546 | | | 0.660624 | | | 0.664147 | | 0.681153 |
| sub42 | 0.64968 | | 0.621072 | | 0.58402039 | | | 0.541482 | | | 0.547594 | | 0.60102 |
| sub43 | 0.663297 | | 0.648866 | | 0.63352536 | | | 0.619251 | | | 0.623462 | | 0.652005 |
| sub44 | 0.817386 | | 0.788215 | | 0.794568968 | | | 0.836883 | | | 0.858311 | | 0.847431 |
| sub45 | 0.776894 | | 0.84063 | | 0.803145156 | | | 0.726996 | | | 0.636766 | | 0.683213 |
| E⊥ in left AG | | | | | | | | | | | | | |
| sub1 | 0.1696454 | | 0.1863272 | | 0.2316151 | | | 0.29677 | | | 0.307351 | | 0.242369 |
| sub2 | 0.291018 | | 0.2581387 | | 0.245510473 | | | 0.261913 | | | 0.283514 | | 0.295297 |
| sub3 | 0.1844275 | | 0.1652607 | | 0.19643947 | | | 0.251376 | | | 0.267044 | | 0.234714 |
| sub4 | 0.2089211 | | 0.2735755 | | 0.330971059 | | | 0.378049 | | | 0.346298 | | 0.257553 |
| sub5 | 0.1286429 | | 0.1481666 | | 0.245680688 | | | 0.33649 | | | 0.329325 | | 0.236363 |
| sub6 | 0.1981215 | | 0.2219974 | | 0.259219085 | | | 0.302659 | | | 0.307831 | | 0.250313 |
| sub7 | 0.2451386 | | 0.1961396 | | 0.263715403 | | | 0.342645 | | | 0.363563 | | 0.321946 |
| sub8 | 0.2412251 | | 0.1935836 | | 0.195900334 | | | 0.252281 | | | 0.297392 | | 0.292681 |
| sub9 | 0.2212583 | | 0.2417635 | | 0.256226862 | | | 0.279185 | | | 0.267583 | | 0.229692 |
| sub10 | 0.2166382 | | 0.2402219 | | 0.25307851 | | | 0.261522 | | | 0.240986 | | 0.217997 |
| sub11 | 0.1852308 | | 0.2113408 | | 0.244773157 | | | 0.28566 | | | 0.292796 | | 0.242374 |
| sub12 | 0.2303486 | | 0.1816278 | | 0.196218445 | | | 0.272774 | | | 0.307201 | | 0.284467 |
| sub13 | 0.3089156 | | 0.3074344 | | 0.31502889 | | | 0.317673 | | | 0.317441 | | 0.314751 |
| sub14 | 0.1775839 | | 0.200692 | | 0.238501495 | | | 0.260363 | | | 0.239577 | | 0.204945 |
| sub15 | 0.2449287 | | 0.1755123 | | 0.180015057 | | | 0.260969 | | | 0.339125 | | 0.331819 |
| sub16 | 0.1834473 | | 0.1971319 | | 0.218588372 | | | 0.236183 | | | 0.212786 | | 0.174576 |
| sub17 | 0.2904132 | | 0.2978485 | | 0.298551264 | | | 0.303086 | | | 0.28772 | | 0.280054 |
| sub18 | 0.2513948 | | 0.2566173 | | 0.271650846 | | | 0.300907 | | | 0.291087 | | 0.257482 |
| sub19 | 0.2263313 | | 0.1853376 | | 0.19872698 | | | 0.27152 | | | 0.311959 | | 0.291131 |
| sub20 | 0.2255991 | | 0.2308831 | | 0.229074636 | | | 0.232881 | | | 0.234937 | | 0.222044 |
| sub21 | 0.1265811 | | 0.1519397 | | 0.194195402 | | | 0.248115 | | | 0.236172 | | 0.170041 |
| sub22 | 0.1908998 | | 0.1917379 | | 0.232560743 | | | 0.271109 | | | 0.254706 | | 0.218689 |
| sub23 | 0.2257385 | | 0.1973759 | | 0.211675764 | | | 0.25663 | | | 0.285025 | | 0.271776 |
| sub24 | 0.2125809 | | 0.1857555 | | 0.213653866 | | | 0.304018 | | | 0.342241 | | 0.290132 |
| sub25 | 0.2404319 | | 0.2294803 | | 0.290634949 | | | 0.38241 | | | 0.398639 | | 0.322266 |
| sub26 | 0.213247 | | 0.2247753 | | 0.270095471 | | | 0.315339 | | | 0.297646 | | 0.255443 |
| sub27 | 0.2047241 | | 0.2116014 | | 0.251380392 | | | 0.323234 | | | 0.326743 | | 0.262956 |
| sub28 | 0.2181104 | | 0.2210911 | | 0.247869727 | | | 0.302486 | | | 0.303637 | | 0.251347 |
| sub29 | 0.2742107 | | 0.2317502 | | 0.196139985 | | | 0.219891 | | | 0.27665 | | 0.296122 |
| sub30 | 0.1983436 | | 0.2244764 | | 0.289184833 | | | 0.314 | | | 0.278044 | | 0.218572 |
| sub31 | 0.239385 | | 0.2457199 | | 0.287112686 | | | 0.325048 | | | 0.327374 | | 0.277962 |
| sub32 | 0.2639295 | | 0.3596146 | | 0.423413128 | | | 0.450468 | | | 0.357399 | | 0.251509 |
| sub33 | 0.2857353 | | 0.2945692 | | 0.313930268 | | | 0.334601 | | | 0.337942 | | 0.312539 |
| sub34 | 0.2540546 | | 0.244286 | | 0.278283143 | | | 0.348326 | | | 0.365354 | | 0.306171 |
| sub35 | 0.271348 | | 0.2899581 | | 0.326466653 | | | 0.36068 | | | 0.335523 | | 0.286374 |
| sub36 | 0.2466512 | | 0.2690572 | | 0.304114523 | | | 0.328457 | | | 0.309764 | | 0.262316 |
| sub37 | 0.2899832 | | 0.2690557 | | 0.300841423 | | | 0.339388 | | | 0.330668 | | 0.313304 |
| sub38 | 0.3006962 | | 0.310175 | | 0.359999194 | | | 0.399423 | | | 0.383 | | 0.328135 |
| sub39 | 0.2724054 | | 0.3089334 | | 0.368402946 | | | 0.428922 | | | 0.390846 | | 0.308899 |
| sub40 | 0.3041153 | | 0.2969051 | | 0.29542362 | | | 0.305642 | | | 0.305901 | | 0.310081 |
| sub41 | 0.2777214 | | 0.2619776 | | 0.280207636 | | | 0.307022 | | | 0.308071 | | 0.298455 |
| sub42 | 0.2594166 | | 0.2559959 | | 0.334588417 | | | 0.383292 | | | 0.36035 | | 0.299553 |
| sub43 | 0.4176275 | | 0.4146063 | | 0.353449259 | | | 0.327394 | | | 0.369181 | | 0.40355 |
| sub44 | 0.2891559 | | 0.2518146 | | 0.295622973 | | | 0.370838 | | | 0.415178 | | 0.365358 |
| sub45 | 0.3377018 | | 0.3464062 | | 0.343370936 | | | 0.343792 | | | 0.337735 | | 0.336098 |
| E*∥* in left AG | | | | | | | | | | | | | |
| sub1 | 0.382755 | | 0.395562 | | 0.371877609 | | | 0.29937 | | | 0.256895 | | 0.3181 |
| sub2 | 0.321599 | | 0.362158 | | 0.357582775 | | | 0.297944 | | | 0.233304 | | 0.251823 |
| sub3 | 0.36009 | | 0.352955 | | 0.325307494 | | | 0.268872 | | | 0.257902 | | 0.323206 |
| sub4 | 0.300604 | | 0.364418 | | 0.37117241 | | | 0.31825 | | | 0.226817 | | 0.218145 |
| sub5 | 0.348922 | | 0.358237 | | 0.337664704 | | | 0.269486 | | | 0.244725 | | 0.301225 |
| sub6 | 0.413656 | | 0.429675 | | 0.428250491 | | | 0.409511 | | | 0.392339 | | 0.392866 |
| sub7 | 0.298788 | | 0.298688 | | 0.26364178 | | | 0.209977 | | | 0.219167 | | 0.266569 |
| sub8 | 0.370891 | | 0.402654 | | 0.398960156 | | | 0.349503 | | | 0.264813 | | 0.284873 |
| sub9 | 0.323794 | | 0.318071 | | 0.277241774 | | | 0.203409 | | | 0.208639 | | 0.279298 |
| sub10 | 0.308564 | | 0.330766 | | 0.30645731 | | | 0.229058 | | | 0.188632 | | 0.247247 |
| sub11 | 0.320102 | | 0.351967 | | 0.347968682 | | | 0.293795 | | | 0.208001 | | 0.242059 |
| sub12 | 0.410521 | | 0.425528 | | 0.415895163 | | | 0.379482 | | | 0.366209 | | 0.382169 |
| sub13 | 0.351532 | | 0.395221 | | 0.360627025 | | | 0.270008 | | | 0.24005 | | 0.286553 |
| sub14 | 0.319756 | | 0.352121 | | 0.363723553 | | | 0.359933 | | | 0.320823 | | 0.297463 |
| sub15 | 0.277732 | | 0.296436 | | 0.275290617 | | | 0.20352 | | | 0.160714 | | 0.219127 |
| sub16 | 0.274407 | | 0.288429 | | 0.284327526 | | | 0.261799 | | | 0.243108 | | 0.251233 |
| sub17 | 0.452863 | | 0.449842 | | 0.41243067 | | | 0.339089 | | | 0.331741 | | 0.407153 |
| sub18 | 0.372357 | | 0.389748 | | 0.382303592 | | | 0.366494 | | | 0.336752 | | 0.33527 |
| sub19 | 0.369999 | | 0.40233 | | 0.387741826 | | | 0.332703 | | | 0.277168 | | 0.296782 |
| sub20 | 0.273751 | | 0.316442 | | 0.328342777 | | | 0.290128 | | | 0.23454 | | 0.229867 |
| sub21 | 0.184453 | | 0.185905 | | 0.172480381 | | | 0.127831 | | | 0.124677 | | 0.160618 |
| sub22 | 0.375195 | | 0.400556 | | 0.398274529 | | | 0.362263 | | | 0.308466 | | 0.320763 |
| sub23 | 0.344085 | | 0.373541 | | 0.362505318 | | | 0.296796 | | | 0.236467 | | 0.282324 |
| sub24 | 0.388983 | | 0.402009 | | 0.379233048 | | | 0.290366 | | | 0.232431 | | 0.312892 |
| sub25 | 0.479451 | | 0.474976 | | 0.429064244 | | | 0.323666 | | | 0.297856 | | 0.409174 |
| sub26 | 0.327731 | | 0.323463 | | 0.292828116 | | | 0.234484 | | | 0.225827 | | 0.287938 |
| sub27 | 0.357715 | | 0.369111 | | 0.351789761 | | | 0.28299 | | | 0.238355 | | 0.305462 |
| sub28 | 0.339852 | | 0.362169 | | 0.339730124 | | | 0.259459 | | | 0.198914 | | 0.267872 |
| sub29 | 0.471099 | | 0.424085 | | 0.381763792 | | | 0.342133 | | | 0.390771 | | 0.459345 |
| sub30 | 0.372377 | | 0.378693 | | 0.328219884 | | | 0.243666 | | | 0.24908 | | 0.330398 |
| sub31 | 0.330022 | | 0.357399 | | 0.336446171 | | | 0.273673 | | | 0.23019 | | 0.273238 |
| sub32 | 0.37225 | | 0.354373 | | 0.313525023 | | | 0.23401 | | | 0.24772 | | 0.332962 |
| sub33 | 0.343007 | | 0.389871 | | 0.423860697 | | | 0.396855 | | | 0.346613 | | 0.329596 |
| sub34 | 0.4599 | | 0.491919 | | 0.467284722 | | | 0.37078 | | | 0.290684 | | 0.362441 |
| sub35 | 0.405196 | | 0.402371 | | 0.364533537 | | | 0.32948 | | | 0.340151 | | 0.373985 |
| sub36 | 0.351182 | | 0.367945 | | 0.37192173 | | | 0.34862 | | | 0.306155 | | 0.315959 |
| sub37 | 0.425414 | | 0.449957 | | 0.43126007 | | | 0.359953 | | | 0.313293 | | 0.371092 |
| sub38 | 0.440159 | | 0.465243 | | 0.429501341 | | | 0.338859 | | | 0.300809 | | 0.366826 |
| sub39 | 0.43063 | | 0.45743 | | 0.431615144 | | | 0.343499 | | | 0.325936 | | 0.377071 |
| sub40 | 0.371523 | | 0.428498 | | 0.450101608 | | | 0.404747 | | | 0.343565 | | 0.323195 |
| sub41 | 0.284033 | | 0.311736 | | 0.317828727 | | | 0.299772 | | | 0.253707 | | 0.248524 |
| sub42 | 0.427683 | | 0.443334 | | 0.395631242 | | | 0.30333 | | | 0.287194 | | 0.36978 |
| sub43 | 0.331486 | | 0.407142 | | 0.456938193 | | | 0.438139 | | | 0.363569 | | 0.30142 |
| sub44 | 0.402519 | | 0.469321 | | 0.438426538 | | | 0.278876 | | | 0.167158 | | 0.287322 |
| sub45 | 0.348898 | | 0.362524 | | 0.327576485 | | | 0.3 | | | 0.294457 | | 0.319675 |
| EWM in left AG | | | | | | | | | | | | | |
| sub1 | 0.494648 | | 0.547641 | | 0.594287584 | | | 0.637074 | | | 0.607779 | | 0.520966 |
| sub2 | 0.630616 | | 0.62578 | | 0.638709767 | | | 0.651083 | | | 0.637448 | | 0.631486 |
| sub3 | 0.466505 | | 0.485166 | | 0.508727118 | | | 0.526444 | | | 0.51146 | | 0.477356 |
| sub4 | 0.675624 | | 0.698904 | | 0.703417994 | | | 0.690161 | | | 0.654148 | | 0.652046 |
| sub5 | 0.347924 | | 0.403061 | | 0.511597961 | | | 0.606525 | | | 0.576 | | 0.447454 |
| sub6 | 0.508024 | | 0.524389 | | 0.559307575 | | | 0.613858 | | | 0.621521 | | 0.551541 |
| sub7 | 0.520476 | | 0.500077 | | 0.631297345 | | | 0.70589 | | | 0.694425 | | 0.617327 |
| sub8 | 0.514814 | | 0.53538 | | 0.54838891 | | | 0.559803 | | | 0.5431 | | 0.51131 |
| sub9 | 0.551734 | | 0.581343 | | 0.600905815 | | | 0.610558 | | | 0.576693 | | 0.540359 |
| sub10 | 0.52462 | | 0.536494 | | 0.514180069 | | | 0.478197 | | | 0.473332 | | 0.49581 |
| sub11 | 0.515674 | | 0.5441 | | 0.559035491 | | | 0.559807 | | | 0.546683 | | 0.521307 |
| sub12 | 0.541527 | | 0.525041 | | 0.53366299 | | | 0.578119 | | | 0.610474 | | 0.583407 |
| sub13 | 0.738037 | | 0.753211 | | 0.721664766 | | | 0.645041 | | | 0.617542 | | 0.674026 |
| sub14 | 0.507933 | | 0.520928 | | 0.52959515 | | | 0.521212 | | | 0.498823 | | 0.496816 |
| sub15 | 0.56948 | | 0.554285 | | 0.55926821 | | | 0.586932 | | | 0.632261 | | 0.621156 |
| sub16 | 0.447066 | | 0.477543 | | 0.496013283 | | | 0.501149 | | | 0.464486 | | 0.426325 |
| sub17 | 0.677581 | | 0.711816 | | 0.722184255 | | | 0.700028 | | | 0.669669 | | 0.655901 |
| sub18 | 0.593983 | | 0.636326 | | 0.689425191 | | | 0.702217 | | | 0.644382 | | 0.596155 |
| sub19 | 0.563701 | | 0.549435 | | 0.561822493 | | | 0.595274 | | | 0.614635 | | 0.598706 |
| sub20 | 0.523225 | | 0.540765 | | 0.529975854 | | | 0.504188 | | | 0.493842 | | 0.493173 |
| sub21 | 0.328583 | | 0.399547 | | 0.467098932 | | | 0.532771 | | | 0.482071 | | 0.368635 |
| sub22 | 0.515887 | | 0.557842 | | 0.582979813 | | | 0.560446 | | | 0.495196 | | 0.48077 |
| sub23 | 0.569413 | | 0.55301 | | 0.552371507 | | | 0.585186 | | | 0.618204 | | 0.603891 |
| sub24 | 0.579411 | | 0.545699 | | 0.541722655 | | | 0.569855 | | | 0.617583 | | 0.621723 |
| sub25 | 0.670828 | | 0.671499 | | 0.68069637 | | | 0.721262 | | | 0.732471 | | 0.688109 |
| sub26 | 0.552642 | | 0.56791 | | 0.589465639 | | | 0.592168 | | | 0.549983 | | 0.550446 |
| sub27 | 0.551026 | | 0.605904 | | 0.641632806 | | | 0.683827 | | | 0.643023 | | 0.551309 |
| sub28 | 0.517446 | | 0.570726 | | 0.587884218 | | | 0.567067 | | | 0.518935 | | 0.483889 |
| sub29 | 0.64763 | | 0.60444 | | 0.549835484 | | | 0.521729 | | | 0.591836 | | 0.648826 |
| sub30 | 0.535812 | | 0.624912 | | 0.665646576 | | | 0.624841 | | | 0.532117 | | 0.489857 |
| sub31 | 0.599596 | | 0.612145 | | 0.644386202 | | | 0.674832 | | | 0.684925 | | 0.638272 |
| sub32 | 0.637226 | | 0.815132 | | 0.908574008 | | | 0.899808 | | | 0.698833 | | 0.551538 |
| sub33 | 0.629286 | | 0.667079 | | 0.746552497 | | | 0.795977 | | | 0.75687 | | 0.675122 |
| sub34 | 0.645768 | | 0.681591 | | 0.720800999 | | | 0.765474 | | | 0.741186 | | 0.669454 |
| sub35 | 0.661715 | | 0.682158 | | 0.716350236 | | | 0.746633 | | | 0.710648 | | 0.662343 |
| sub36 | 0.591837 | | 0.632926 | | 0.670420171 | | | 0.689135 | | | 0.648705 | | 0.594692 |
| sub37 | 0.687686 | | 0.714257 | | 0.745542134 | | | 0.738539 | | | 0.685409 | | 0.67071 |
| sub38 | 0.718071 | | 0.79961 | | 0.852164811 | | | 0.830225 | | | 0.72669 | | 0.668546 |
| sub39 | 0.6546 | | 0.763972 | | 0.88698722 | | | 0.938847 | | | 0.831024 | | 0.676796 |
| sub40 | 0.670222 | | 0.71045 | | 0.737143583 | | | 0.702817 | | | 0.648691 | | 0.643381 |
| sub41 | 0.604853 | | 0.647903 | | 0.673090003 | | | 0.657808 | | | 0.601965 | | 0.577068 |
| sub42 | 0.62632 | | 0.707547 | | 0.778422484 | | | 0.766784 | | | 0.67777 | | 0.607579 |
| sub43 | 0.897941 | | 0.929095 | | 0.869162193 | | | 0.772322 | | | 0.771942 | | 0.833335 |
| sub44 | 0.726861 | | 0.708812 | | 0.722022942 | | | 0.772865 | | | 0.823435 | | 0.784171 |
| sub45 | 0.659103 | | 0.676482 | | 0.741752946 | | | 0.74646 | | | 0.718912 | | 0.679625 |
| EGM in left AG | | | | | | | | | | | | | |
| sub1 | 0.477153 | | 0.490072 | | 0.495262883 | | | 0.491179 | | | 0.478984 | | 0.471583 |
| sub2 | 0.504096 | | 0.503016 | | 0.503233027 | | | 0.502353 | | | 0.501773 | | 0.503913 |
| sub3 | 0.409888 | | 0.412743 | | 0.405953537 | | | 0.392845 | | | 0.389931 | | 0.399233 |
| sub4 | 0.565418 | | 0.562493 | | 0.570305507 | | | 0.586387 | | | 0.596747 | | 0.586968 |
| sub5 | 0.335275 | | 0.367871 | | 0.419242059 | | | 0.458271 | | | 0.432314 | | 0.368854 |
| sub6 | 0.433428 | | 0.438147 | | 0.435951719 | | | 0.429174 | | | 0.422948 | | 0.423505 |
| sub7 | 0.492999 | | 0.493324 | | 0.514328585 | | | 0.518905 | | | 0.511571 | | 0.50225 |
| sub8 | 0.45613 | | 0.467129 | | 0.473185287 | | | 0.474791 | | | 0.463631 | | 0.450609 |
| sub9 | 0.53318 | | 0.548679 | | 0.556438096 | | | 0.553588 | | | 0.53595 | | 0.524644 |
| sub10 | 0.428251 | | 0.436055 | | 0.421329918 | | | 0.398326 | | | 0.396184 | | 0.411574 |
| sub11 | 0.457053 | | 0.467247 | | 0.472081784 | | | 0.470294 | | | 0.45952 | | 0.45274 |
| sub12 | 0.449573 | | 0.455675 | | 0.458343163 | | | 0.458165 | | | 0.449781 | | 0.444466 |
| sub13 | 0.602595 | | 0.605694 | | 0.604491391 | | | 0.60035 | | | 0.59901 | | 0.599161 |
| sub14 | 0.456055 | | 0.469812 | | 0.464034824 | | | 0.439269 | | | 0.417424 | | 0.428189 |
| sub15 | 0.505281 | | 0.490612 | | 0.487934598 | | | 0.492571 | | | 0.508675 | | 0.516753 |
| sub16 | 0.356874 | | 0.38861 | | 0.406156861 | | | 0.396593 | | | 0.358464 | | 0.336285 |
| sub17 | 0.60287 | | 0.612329 | | 0.585833481 | | | 0.518438 | | | 0.510207 | | 0.561899 |
| sub18 | 0.528201 | | 0.53912 | | 0.549989409 | | | 0.550803 | | | 0.538621 | | 0.528173 |
| sub19 | 0.48779 | | 0.489157 | | 0.492394006 | | | 0.4967 | | | 0.496283 | | 0.490626 |
| sub20 | 0.418616 | | 0.441801 | | 0.448554308 | | | 0.430596 | | | 0.400983 | | 0.395305 |
| sub21 | 0.255547 | | 0.267559 | | 0.283626942 | | | 0.303969 | | | 0.294188 | | 0.267137 |
| sub22 | 0.425316 | | 0.452827 | | 0.466467734 | | | 0.448855 | | | 0.410262 | | 0.404363 |
| sub23 | 0.512953 | | 0.50827 | | 0.51532122 | | | 0.534801 | | | 0.541706 | | 0.530409 |
| sub24 | 0.496445 | | 0.492869 | | 0.494354047 | | | 0.502247 | | | 0.506557 | | 0.503533 |
| sub25 | 0.58607 | | 0.586603 | | 0.590429644 | | | 0.595992 | | | 0.594656 | | 0.590072 |
| sub26 | 0.437049 | | 0.446402 | | 0.454491468 | | | 0.450897 | | | 0.434096 | | 0.433784 |
| sub27 | 0.469481 | | 0.482494 | | 0.494620871 | | | 0.508257 | | | 0.498744 | | 0.474326 |
| sub28 | 0.439527 | | 0.462743 | | 0.472479954 | | | 0.461641 | | | 0.435987 | | 0.424971 |
| sub29 | 0.489269 | | 0.486033 | | 0.460034837 | | | 0.423683 | | | 0.428782 | | 0.465099 |
| sub30 | 0.457206 | | 0.489498 | | 0.490511857 | | | 0.459372 | | | 0.428081 | | 0.431511 |
| sub31 | 0.450068 | | 0.476199 | | 0.498646169 | | | 0.486321 | | | 0.457789 | | 0.441448 |
| sub32 | 0.505026 | | 0.554759 | | 0.582092971 | | | 0.579592 | | | 0.528789 | | 0.487678 |
| sub33 | 0.543989 | | 0.569857 | | 0.60151254 | | | 0.605733 | | | 0.57445 | | 0.54612 |
| sub34 | 0.598082 | | 0.612225 | | 0.610967078 | | | 0.596962 | | | 0.57148 | | 0.57231 |
| sub35 | 0.55751 | | 0.559993 | | 0.560455883 | | | 0.55801 | | | 0.54921 | | 0.551454 |
| sub36 | 0.484908 | | 0.522581 | | 0.552489901 | | | 0.550324 | | | 0.497081 | | 0.468024 |
| sub37 | 0.586702 | | 0.600879 | | 0.60589312 | | | 0.588027 | | | 0.566748 | | 0.571976 |
| sub38 | 0.615741 | | 0.643117 | | 0.652338879 | | | 0.627296 | | | 0.588059 | | 0.588582 |
| sub39 | 0.59232 | | 0.631449 | | 0.662256452 | | | 0.65264 | | | 0.610802 | | 0.580683 |
| sub40 | 0.56858 | | 0.609966 | | 0.62136173 | | | 0.583531 | | | 0.540882 | | 0.535015 |
| sub41 | 0.470992 | | 0.484373 | | 0.493750632 | | | 0.492273 | | | 0.475781 | | 0.46702 |
| sub42 | 0.558073 | | 0.571247 | | 0.59113457 | | | 0.591458 | | | 0.571352 | | 0.557823 |
| sub43 | 0.6473 | | 0.659115 | | 0.666785243 | | | 0.654329 | | | 0.636223 | | 0.636518 |
| sub44 | 0.558184 | | 0.58557 | | 0.564897786 | | | 0.498207 | | | 0.479578 | | 0.518352 |
| sub45 | 0.564124 | | 0.575099 | | 0.564971549 | | | 0.550574 | | | 0.548517 | | 0.553524 |
| EROI in left AG | | | | | | | | | | | | | |
| sub1 | 0.48398 | | 0.512536 | | 0.533904073 | | | 0.54811 | | | 0.529242 | | 0.490853 |
| sub2 | 0.547749 | | 0.545373 | | 0.549976935 | | | 0.553669 | | | 0.548585 | | 0.54793 |
| sub3 | 0.436529 | | 0.446821 | | 0.454312929 | | | 0.455709 | | | 0.447116 | | 0.435993 |
| sub4 | 0.603657 | | 0.609824 | | 0.616491836 | | | 0.622394 | | | 0.616664 | | 0.609548 |
| sub5 | 0.340314 | | 0.38189 | | 0.45603381 | | | 0.517331 | | | 0.489554 | | 0.400166 |
| sub6 | 0.462865 | | 0.47218 | | 0.484630743 | | | 0.502055 | | | 0.501309 | | 0.474031 |
| sub7 | 0.503119 | | 0.495811 | | 0.557407088 | | | 0.58777 | | | 0.578914 | | 0.544632 |
| sub8 | 0.480641 | | 0.495635 | | 0.504595377 | | | 0.510298 | | | 0.496823 | | 0.475962 |
| sub9 | 0.541254 | | 0.562893 | | 0.575787906 | | | 0.578378 | | | 0.553679 | | 0.531482 |
| sub10 | 0.478755 | | 0.488692 | | 0.469989872 | | | 0.440184 | | | 0.436615 | | 0.455719 |
| sub11 | 0.482319 | | 0.500371 | | 0.509559358 | | | 0.508875 | | | 0.497087 | | 0.482293 |
| sub12 | 0.483752 | | 0.481458 | | 0.486338695 | | | 0.502751 | | | 0.509509 | | 0.496109 |
| sub13 | 0.658053 | | 0.666097 | | 0.65246923 | | | 0.618649 | | | 0.606598 | | 0.629815 |
| sub14 | 0.478685 | | 0.492109 | | 0.492632456 | | | 0.475013 | | | 0.45293 | | 0.458124 |
| sub15 | 0.529666 | | 0.514797 | | 0.515029489 | | | 0.528413 | | | 0.555617 | | 0.556409 |
| sub16 | 0.395383 | | 0.426581 | | 0.44452194 | | | 0.441234 | | | 0.403731 | | 0.374728 |
| sub17 | 0.636797 | | 0.657506 | | 0.647750546 | | | 0.600898 | | | 0.582619 | | 0.604585 |
| sub18 | 0.553583 | | 0.576626 | | 0.603790068 | | | 0.609226 | | | 0.579429 | | 0.554403 |
| sub19 | 0.521413 | | 0.515856 | | 0.523146041 | | | 0.540361 | | | 0.548705 | | 0.538498 |
| sub20 | 0.451072 | | 0.472505 | | 0.47381606 | | | 0.453428 | | | 0.429793 | | 0.42567 |
| sub21 | 0.285525 | | 0.321735 | | 0.358935246 | | | 0.397884 | | | 0.371307 | | 0.308798 |
| sub22 | 0.47267 | | 0.507733 | | 0.527384908 | | | 0.5072 | | | 0.454669 | | 0.444312 |
| sub23 | 0.534603 | | 0.525426 | | 0.529528835 | | | 0.554122 | | | 0.57104 | | 0.558587 |
| sub24 | 0.529112 | | 0.51367 | | 0.513004806 | | | 0.528867 | | | 0.550272 | | 0.550069 |
| sub25 | 0.627481 | | 0.628082 | | 0.634532451 | | | 0.657197 | | | 0.66199 | | 0.637971 |
| sub26 | 0.486146 | | 0.498012 | | 0.511820704 | | | 0.510901 | | | 0.483318 | | 0.483335 |
| sub27 | 0.50323 | | 0.53357 | | 0.55546453 | | | 0.58092 | | | 0.558457 | | 0.506187 |
| sub28 | 0.470652 | | 0.505878 | | 0.518579129 | | | 0.503754 | | | 0.469121 | | 0.448506 |
| sub29 | 0.558632 | | 0.537896 | | 0.49936781 | | | 0.466627 | | | 0.5002 | | 0.545572 |
| sub30 | 0.50142 | | 0.565666 | | 0.589022169 | | | 0.552446 | | | 0.486599 | | 0.464329 |
| sub31 | 0.531156 | | 0.549922 | | 0.577679784 | | | 0.588549 | | | 0.580963 | | 0.548184 |
| sub32 | 0.565645 | | 0.674149 | | 0.731795957 | | | 0.726422 | | | 0.60676 | | 0.51696 |
| sub33 | 0.586915 | | 0.618784 | | 0.674504285 | | | 0.701474 | | | 0.666253 | | 0.611041 |
| sub34 | 0.617595 | | 0.640609 | | 0.655910194 | | | 0.665916 | | | 0.640922 | | 0.612061 |
| sub35 | 0.598501 | | 0.608049 | | 0.621779457 | | | 0.632208 | | | 0.612714 | | 0.595074 |
| sub36 | 0.534622 | | 0.573883 | | 0.607318249 | | | 0.61486 | | | 0.567574 | | 0.526915 |
| sub37 | 0.633133 | | 0.653009 | | 0.670102111 | | | 0.65723 | | | 0.621307 | | 0.617373 |
| sub38 | 0.66975 | | 0.725713 | | 0.757805532 | | | 0.7344 | | | 0.661227 | | 0.630786 |
| sub39 | 0.623978 | | 0.698812 | | 0.776490628 | | | 0.798123 | | | 0.722744 | | 0.629538 |
| sub40 | 0.619662 | | 0.660467 | | 0.679550603 | | | 0.643481 | | | 0.595064 | | 0.589477 |
| sub41 | 0.520553 | | 0.544919 | | 0.560150209 | | | 0.553562 | | | 0.5225 | | 0.507765 |
| sub42 | 0.595309 | | 0.645614 | | 0.693320197 | | | 0.687117 | | | 0.629414 | | 0.584971 |
| sub43 | 0.752936 | | 0.772901 | | 0.752079605 | | | 0.704059 | | | 0.693424 | | 0.719469 |
| sub44 | 0.667625 | | 0.665532 | | 0.666843781 | | | 0.676411 | | | 0.702679 | | 0.690821 |
| sub45 | 0.612482 | | 0.626717 | | 0.654978315 | | | 0.650308 | | | 0.635272 | | 0.617727 |
| E⊥ in PC | | | | | | | | | | | | | |
| sub1 | 0.085892 | | 0.083399 | | 0.107244099 | | | 0.123015 | | | 0.124987 | | 0.1090876 |
| sub2 | 0.093647 | | 0.091376 | | 0.100336673 | | | 0.110654 | | | 0.111552 | | 0.1032273 |
| sub3 | 0.064343 | | 0.077889 | | 0.106644362 | | | 0.123317 | | | 0.111153 | | 0.0842842 |
| sub4 | 0.158848 | | 0.157521 | | 0.186703494 | | | 0.206002 | | | 0.203317 | | 0.1789183 |
| sub5 | 0.137203 | | 0.137567 | | 0.1453797 | | | 0.150438 | | | 0.15771 | | 0.1528389 |
| sub6 | 0.11027 | | 0.112989 | | 0.120365078 | | | 0.122398 | | | 0.121269 | | 0.1143301 |
| sub7 | 0.05018 | | 0.042319 | | 0.063765947 | | | 0.081799 | | | 0.085173 | | 0.0707618 |
| sub8 | 0.10834 | | 0.10289 | | 0.113548494 | | | 0.13427 | | | 0.139003 | | 0.1292788 |
| sub9 | 0.125583 | | 0.132451 | | 0.159537251 | | | 0.192091 | | | 0.188989 | | 0.1609755 |
| sub10 | 0.076891 | | 0.057907 | | 0.089045237 | | | 0.116553 | | | 0.123713 | | 0.1010052 |
| sub11 | 0.146777 | | 0.145043 | | 0.14915337 | | | 0.167987 | | | 0.171336 | | 0.1509734 |
| sub12 | 0.12068 | | 0.131015 | | 0.184101765 | | | 0.218356 | | | 0.208143 | | 0.1690354 |
| sub13 | 0.094476 | | 0.118118 | | 0.139624085 | | | 0.150568 | | | 0.134954 | | 0.1084282 |
| sub14 | 0.118291 | | 0.106943 | | 0.100698727 | | | 0.106928 | | | 0.118312 | | 0.1241821 |
| sub15 | 0.168827 | | 0.18417 | | 0.221395985 | | | 0.258009 | | | 0.250798 | | 0.2075881 |
| sub16 | 0.074338 | | 0.068949 | | 0.089814036 | | | 0.111447 | | | 0.11632 | | 0.098206 |
| sub17 | 0.139234 | | 0.110019 | | 0.125521813 | | | 0.170687 | | | 0.186643 | | 0.1757804 |
| sub18 | 0.119256 | | 0.128807 | | 0.140277446 | | | 0.148138 | | | 0.132897 | | 0.1123051 |
| sub19 | 0.1232 | | 0.139342 | | 0.174623919 | | | 0.194038 | | | 0.184649 | | 0.1504999 |
| sub20 | 0.100985 | | 0.119414 | | 0.1432389 | | | 0.156349 | | | 0.144887 | | 0.1185512 |
| sub21 | 0.074987 | | 0.078811 | | 0.091417296 | | | 0.098171 | | | 0.092499 | | 0.0827515 |
| sub22 | 0.062705 | | 0.077663 | | 0.094605387 | | | 0.099236 | | | 0.08897 | | 0.0739985 |
| sub23 | 0.123529 | | 0.129891 | | 0.136515823 | | | 0.140894 | | | 0.136482 | | 0.1274852 |
| sub24 | 0.128844 | | 0.149797 | | 0.16176116 | | | 0.157502 | | | 0.138316 | | 0.1248397 |
| sub25 | 0.14181 | | 0.139615 | | 0.142187641 | | | 0.144491 | | | 0.145365 | | 0.1458796 |
| sub26 | 0.107211 | | 0.097029 | | 0.112347764 | | | 0.130938 | | | 0.137013 | | 0.1309571 |
| sub27 | 0.153701 | | 0.138962 | | 0.140653002 | | | 0.156817 | | | 0.160402 | | 0.1581736 |
| sub28 | 0.061499 | | 0.070405 | | 0.084022179 | | | 0.094258 | | | 0.092232 | | 0.0775718 |
| sub29 | 0.09385 | | 0.088967 | | 0.093612648 | | | 0.103064 | | | 0.109078 | | 0.1047385 |
| sub30 | 0.077171 | | 0.076131 | | 0.088323645 | | | 0.103168 | | | 0.106511 | | 0.0953278 |
| sub31 | 0.117637 | | 0.12157 | | 0.145938446 | | | 0.164475 | | | 0.155525 | | 0.1282978 |
| sub32 | 0.124975 | | 0.142354 | | 0.185619662 | | | 0.212454 | | | 0.201651 | | 0.1533635 |
| sub33 | 0.091574 | | 0.088209 | | 0.103841265 | | | 0.12112 | | | 0.122512 | | 0.1114476 |
| sub34 | 0.110881 | | 0.129253 | | 0.167606007 | | | 0.203202 | | | 0.193959 | | 0.1524651 |
| sub35 | 0.112456 | | 0.10037 | | 0.113035749 | | | 0.137329 | | | 0.145696 | | 0.1321399 |
| sub36 | 0.092228 | | 0.083037 | | 0.102489737 | | | 0.135207 | | | 0.145197 | | 0.1300365 |
| sub37 | 0.123628 | | 0.133405 | | 0.156637995 | | | 0.184903 | | | 0.176425 | | 0.1442346 |
| sub38 | 0.101066 | | 0.101214 | | 0.125213069 | | | 0.151251 | | | 0.146691 | | 0.1212565 |
| sub39 | 0.15163 | | 0.128807 | | 0.120478436 | | | 0.149005 | | | 0.169432 | | 0.1711115 |
| sub40 | 0.087845 | | 0.091985 | | 0.106167196 | | | 0.124631 | | | 0.125018 | | 0.1069291 |
| sub41 | 0.072628 | | 0.073521 | | 0.099487667 | | | 0.114945 | | | 0.112681 | | 0.0911756 |
| sub42 | 0.083846 | | 0.08577 | | 0.101140755 | | | 0.118354 | | | 0.120569 | | 0.1056439 |
| sub43 | 0.098913 | | 0.097212 | | 0.121346865 | | | 0.145556 | | | 0.148949 | | 0.128262 |
| sub44 | 0.141753 | | 0.154971 | | 0.155967484 | | | 0.152809 | | | 0.147574 | | 0.1362317 |
| sub45 | 0.114955 | | 0.111186 | | 0.137511768 | | | 0.163421 | | | 0.172532 | | 0.1551257 |
| E*∥* in PC | | | | | | | | | | | | | |
| sub1 | 0.11057 | | 0.11256 | | 0.130768082 | | | 0.130867 | | | 0.129849 | | 0.126834 |
| sub2 | 0.112344 | | 0.123336 | | 0.166085792 | | | 0.190615 | | | 0.187139 | | 0.157479 |
| sub3 | 0.124887 | | 0.146325 | | 0.190826831 | | | 0.220867 | | | 0.211187 | | 0.175447 |
| sub4 | 0.135023 | | 0.133306 | | 0.166683122 | | | 0.194358 | | | 0.195876 | | 0.176189 |
| sub5 | 0.154776 | | 0.162622 | | 0.188265033 | | | 0.199226 | | | 0.189909 | | 0.178716 |
| sub6 | 0.12463 | | 0.125078 | | 0.137046231 | | | 0.14891 | | | 0.162048 | | 0.155456 |
| sub7 | 0.08604 | | 0.105836 | | 0.134008407 | | | 0.13877 | | | 0.126117 | | 0.10331 |
| sub8 | 0.267337 | | 0.269078 | | 0.280962845 | | | 0.27631 | | | 0.286994 | | 0.292448 |
| sub9 | 0.104028 | | 0.1254 | | 0.15752219 | | | 0.174765 | | | 0.167622 | | 0.139267 |
| sub10 | 0.118784 | | 0.112394 | | 0.128106412 | | | 0.141719 | | | 0.15246 | | 0.143806 |
| sub11 | 0.152364 | | 0.156149 | | 0.178162037 | | | 0.186867 | | | 0.186986 | | 0.18128 |
| sub12 | 0.197663 | | 0.211348 | | 0.223287449 | | | 0.215284 | | | 0.204676 | | 0.207586 |
| sub13 | 0.066873 | | 0.070429 | | 0.085584919 | | | 0.091699 | | | 0.090479 | | 0.081888 |
| sub14 | 0.106176 | | 0.115172 | | 0.13727575 | | | 0.14867 | | | 0.149168 | | 0.135215 |
| sub15 | 0.137565 | | 0.16251 | | 0.189699098 | | | 0.20017 | | | 0.192904 | | 0.17001 |
| sub16 | 0.093568 | | 0.111643 | | 0.137961331 | | | 0.146858 | | | 0.140244 | | 0.12053 |
| sub17 | 0.15531 | | 0.150947 | | 0.184861173 | | | 0.208057 | | | 0.204379 | | 0.185899 |
| sub18 | 0.124882 | | 0.136165 | | 0.159409627 | | | 0.182629 | | | 0.183446 | | 0.157582 |
| sub19 | 0.172162 | | 0.194471 | | 0.209926965 | | | 0.206065 | | | 0.200336 | | 0.192993 |
| sub20 | 0.13746 | | 0.135043 | | 0.168364868 | | | 0.190347 | | | 0.190057 | | 0.172246 |
| sub21 | 0.086541 | | 0.092265 | | 0.117974487 | | | 0.130174 | | | 0.127451 | | 0.11088 |
| sub22 | 0.153353 | | 0.161492 | | 0.183593853 | | | 0.205393 | | | 0.204933 | | 0.186229 |
| sub23 | 0.083359 | | 0.085685 | | 0.10009992 | | | 0.110366 | | | 0.111553 | | 0.102668 |
| sub24 | 0.157151 | | 0.153754 | | 0.174860619 | | | 0.204978 | | | 0.215163 | | 0.200532 |
| sub25 | 0.186264 | | 0.171484 | | 0.221476151 | | | 0.266262 | | | 0.27093 | | 0.241229 |
| sub26 | 0.107759 | | 0.109387 | | 0.145537 | | | 0.175158 | | | 0.1772 | | 0.156165 |
| sub27 | 0.135065 | | 0.139877 | | 0.18481827 | | | 0.213058 | | | 0.206975 | | 0.175689 |
| sub28 | 0.082952 | | 0.099917 | | 0.111742615 | | | 0.112362 | | | 0.107614 | | 0.095804 |
| sub29 | 0.169382 | | 0.184652 | | 0.220400774 | | | 0.239183 | | | 0.238207 | | 0.211646 |
| sub30 | 0.100472 | | 0.099972 | | 0.137342274 | | | 0.149515 | | | 0.145385 | | 0.128566 |
| sub31 | 0.134874 | | 0.158873 | | 0.193087596 | | | 0.200262 | | | 0.190533 | | 0.165864 |
| sub32 | 0.18868 | | 0.196432 | | 0.206566118 | | | 0.210384 | | | 0.21737 | | 0.209307 |
| sub33 | 0.115752 | | 0.120366 | | 0.155838508 | | | 0.178003 | | | 0.176037 | | 0.154182 |
| sub34 | 0.188413 | | 0.212623 | | 0.251917703 | | | 0.277036 | | | 0.266191 | | 0.231264 |
| sub35 | 0.133038 | | 0.146958 | | 0.174403005 | | | 0.191052 | | | 0.182632 | | 0.161825 |
| sub36 | 0.125916 | | 0.115275 | | 0.144150544 | | | 0.176359 | | | 0.184131 | | 0.167989 |
| sub37 | 0.17167 | | 0.171429 | | 0.198926875 | | | 0.227467 | | | 0.226753 | | 0.203586 |
| sub38 | 0.137914 | | 0.129074 | | 0.158200588 | | | 0.194309 | | | 0.203689 | | 0.18311 |
| sub39 | 0.150343 | | 0.159089 | | 0.198609017 | | | 0.216764 | | | 0.213684 | | 0.192231 |
| sub40 | 0.143909 | | 0.139567 | | 0.157673316 | | | 0.166191 | | | 0.171544 | | 0.169646 |
| sub41 | 0.114786 | | 0.112546 | | 0.145743791 | | | 0.164048 | | | 0.166591 | | 0.145136 |
| sub42 | 0.103232 | | 0.115093 | | 0.150565259 | | | 0.16506 | | | 0.158987 | | 0.135975 |
| sub43 | 0.130178 | | 0.130402 | | 0.154234071 | | | 0.166544 | | | 0.162811 | | 0.151152 |
| sub44 | 0.175416 | | 0.177326 | | 0.201134557 | | | 0.223849 | | | 0.236189 | | 0.214751 |
| sub45 | 0.145002 | | 0.159954 | | 0.202579636 | | | 0.221548 | | | 0.205859 | | 0.182178 |
| EWM in PC | | | | | | | | | | | | | |
| sub1 | 0.218758 | | 0.226122 | | 0.267994288 | | | 0.290148 | | | 0.277993 | | 0.244023 |
| sub2 | 0.242426 | | 0.243935 | | 0.26327424 | | | 0.284798 | | | 0.279342 | | 0.255594 |
| sub3 | 0.186449 | | 0.194895 | | 0.242167639 | | | 0.279085 | | | 0.271277 | | 0.229322 |
| sub4 | 0.406269 | | 0.417467 | | 0.461710195 | | | 0.487886 | | | 0.467691 | | 0.426668 |
| sub5 | 0.394537 | | 0.386512 | | 0.365684209 | | | 0.359945 | | | 0.390061 | | 0.400844 |
| sub6 | 0.309971 | | 0.298036 | | 0.29711407 | | | 0.306438 | | | 0.320251 | | 0.322306 |
| sub7 | 0.125095 | | 0.116597 | | 0.156353201 | | | 0.191298 | | | 0.19652 | | 0.16595 |
| sub8 | 0.274354 | | 0.262247 | | 0.286676207 | | | 0.319249 | | | 0.3322 | | 0.318558 |
| sub9 | 0.329693 | | 0.333333 | | 0.365227014 | | | 0.407308 | | | 0.406071 | | 0.373113 |
| sub10 | 0.188133 | | 0.16443 | | 0.23391374 | | | 0.296758 | | | 0.310181 | | 0.251003 |
| sub11 | 0.375464 | | 0.363836 | | 0.373893319 | | | 0.413562 | | | 0.427494 | | 0.400737 |
| sub12 | 0.316105 | | 0.348767 | | 0.422158036 | | | 0.466514 | | | 0.433296 | | 0.37016 |
| sub13 | 0.291398 | | 0.316386 | | 0.337402487 | | | 0.346201 | | | 0.335715 | | 0.309088 |
| sub14 | 0.3206 | | 0.319792 | | 0.319747469 | | | 0.313478 | | | 0.313849 | | 0.320829 |
| sub15 | 0.419885 | | 0.449353 | | 0.506437686 | | | 0.552964 | | | 0.538187 | | 0.479113 |
| sub16 | 0.196955 | | 0.188515 | | 0.226023491 | | | 0.269744 | | | 0.282548 | | 0.248355 |
| sub17 | 0.387026 | | 0.352728 | | 0.377671353 | | | 0.426289 | | | 0.437822 | | 0.426149 |
| sub18 | 0.267913 | | 0.292723 | | 0.32699082 | | | 0.351423 | | | 0.323714 | | 0.275359 |
| sub19 | 0.329071 | | 0.369676 | | 0.411451964 | | | 0.417943 | | | 0.388046 | | 0.347711 |
| sub20 | 0.261982 | | 0.306191 | | 0.368056088 | | | 0.405322 | | | 0.384697 | | 0.316604 |
| sub21 | 0.206239 | | 0.206343 | | 0.219941149 | | | 0.232682 | | | 0.226064 | | 0.215552 |
| sub22 | 0.156177 | | 0.184494 | | 0.220312233 | | | 0.230849 | | | 0.207678 | | 0.172426 |
| sub23 | 0.272103 | | 0.310631 | | 0.34426498 | | | 0.362615 | | | 0.335798 | | 0.289694 |
| sub24 | 0.296168 | | 0.348214 | | 0.388953477 | | | 0.395572 | | | 0.35776 | | 0.306861 |
| sub25 | 0.365839 | | 0.33162 | | 0.335117228 | | | 0.377223 | | | 0.413574 | | 0.405957 |
| sub26 | 0.315108 | | 0.320799 | | 0.342603686 | | | 0.35477 | | | 0.342353 | | 0.324122 |
| sub27 | 0.332164 | | 0.318369 | | 0.361631111 | | | 0.424085 | | | 0.430763 | | 0.387928 |
| sub28 | 0.158793 | | 0.17565 | | 0.199726228 | | | 0.218297 | | | 0.208794 | | 0.177787 |
| sub29 | 0.258716 | | 0.267708 | | 0.295415834 | | | 0.314299 | | | 0.30477 | | 0.276994 |
| sub30 | 0.21609 | | 0.216288 | | 0.246406333 | | | 0.270214 | | | 0.271377 | | 0.247614 |
| sub31 | 0.311867 | | 0.337799 | | 0.375018791 | | | 0.400563 | | | 0.369639 | | 0.315713 |
| sub32 | 0.311756 | | 0.341093 | | 0.421248783 | | | 0.482478 | | | 0.466448 | | 0.367454 |
| sub33 | 0.238998 | | 0.237588 | | 0.275322431 | | | 0.312609 | | | 0.31361 | | 0.28206 |
| sub34 | 0.331988 | | 0.38255 | | 0.47447413 | | | 0.540166 | | | 0.494068 | | 0.393866 |
| sub35 | 0.289704 | | 0.272241 | | 0.291364647 | | | 0.344754 | | | 0.361147 | | 0.325149 |
| sub36 | 0.253125 | | 0.218858 | | 0.255578986 | | | 0.331798 | | | 0.358544 | | 0.331321 |
| sub37 | 0.323598 | | 0.327518 | | 0.373659429 | | | 0.434794 | | | 0.430425 | | 0.376222 |
| sub38 | 0.258919 | | 0.266031 | | 0.318395117 | | | 0.373368 | | | 0.359374 | | 0.30369 |
| sub39 | 0.411606 | | 0.358678 | | 0.352145589 | | | 0.403955 | | | 0.446579 | | 0.458051 |
| sub40 | 0.250624 | | 0.234224 | | 0.25462432 | | | 0.299332 | | | 0.311416 | | 0.290808 |
| sub41 | 0.218722 | | 0.222102 | | 0.269354915 | | | 0.296593 | | | 0.287021 | | 0.246669 |
| sub42 | 0.231931 | | 0.232272 | | 0.254706219 | | | 0.277745 | | | 0.282795 | | 0.261927 |
| sub43 | 0.237679 | | 0.235916 | | 0.284851316 | | | 0.330189 | | | 0.336836 | | 0.297193 |
| sub44 | 0.357033 | | 0.353706 | | 0.363430817 | | | 0.377712 | | | 0.38944 | | 0.374293 |
| sub45 | 0.276695 | | 0.289739 | | 0.362787574 | | | 0.42285 | | | 0.422764 | | 0.365453 |
| EGM in PC | | | | | | | | | | | | | |
| sub1 | 0.145084 | | 0.144673 | | 0.182358345 | | | 0.205382 | | | 0.203364 | | 0.177975 |
| sub2 | 0.15042 | | 0.157854 | | 0.186347576 | | | 0.208415 | | | 0.2088 | | 0.183825 |
| sub3 | 0.141366 | | 0.143118 | | 0.179116979 | | | 0.208163 | | | 0.208757 | | 0.180315 |
| sub4 | 0.241883 | | 0.260326 | | 0.323540617 | | | 0.367211 | | | 0.361767 | | 0.304865 |
| sub5 | 0.204382 | | 0.224057 | | 0.26107021 | | | 0.287816 | | | 0.283951 | | 0.249275 |
| sub6 | 0.16125 | | 0.180993 | | 0.215687405 | | | 0.233694 | | | 0.222776 | | 0.191341 |
| sub7 | 0.08489 | | 0.086041 | | 0.116834328 | | | 0.139438 | | | 0.140857 | | 0.117593 |
| sub8 | 0.178485 | | 0.173384 | | 0.214105436 | | | 0.255451 | | | 0.261953 | | 0.234593 |
| sub9 | 0.251985 | | 0.269027 | | 0.300070238 | | | 0.326441 | | | 0.319018 | | 0.290813 |
| sub10 | 0.119474 | | 0.127029 | | 0.172794517 | | | 0.200525 | | | 0.1988 | | 0.157313 |
| sub11 | 0.228368 | | 0.232418 | | 0.266702698 | | | 0.296789 | | | 0.293343 | | 0.263771 |
| sub12 | 0.200852 | | 0.219638 | | 0.282965348 | | | 0.326882 | | | 0.318301 | | 0.271587 |
| sub13 | 0.165121 | | 0.180438 | | 0.21585461 | | | 0.242516 | | | 0.236016 | | 0.206053 |
| sub14 | 0.177174 | | 0.187788 | | 0.228684492 | | | 0.264953 | | | 0.264819 | | 0.231681 |
| sub15 | 0.338908 | | 0.352043 | | 0.393928504 | | | 0.425521 | | | 0.423441 | | 0.3887 |
| sub16 | 0.128803 | | 0.141117 | | 0.179172621 | | | 0.208156 | | | 0.208401 | | 0.171648 |
| sub17 | 0.223138 | | 0.198284 | | 0.239920479 | | | 0.295406 | | | 0.309975 | | 0.283771 |
| sub18 | 0.180476 | | 0.203056 | | 0.236622002 | | | 0.263812 | | | 0.256091 | | 0.213885 |
| sub19 | 0.215887 | | 0.248592 | | 0.296239313 | | | 0.322112 | | | 0.309011 | | 0.263035 |
| sub20 | 0.183955 | | 0.192515 | | 0.23699565 | | | 0.269873 | | | 0.265879 | | 0.230503 |
| sub21 | 0.119583 | | 0.126964 | | 0.161220933 | | | 0.180014 | | | 0.175349 | | 0.149331 |
| sub22 | 0.112252 | | 0.122644 | | 0.150735651 | | | 0.167552 | | | 0.161058 | | 0.137241 |
| sub23 | 0.207205 | | 0.219463 | | 0.25154104 | | | 0.284297 | | | 0.280546 | | 0.248411 |
| sub24 | 0.218129 | | 0.23338 | | 0.272284509 | | | 0.300053 | | | 0.295071 | | 0.261423 |
| sub25 | 0.243788 | | 0.230005 | | 0.271094051 | | | 0.327464 | | | 0.337447 | | 0.301614 |
| sub26 | 0.168853 | | 0.161119 | | 0.202480582 | | | 0.246684 | | | 0.253811 | | 0.227985 |
| sub27 | 0.223055 | | 0.217775 | | 0.261726735 | | | 0.301878 | | | 0.304445 | | 0.27213 |
| sub28 | 0.110884 | | 0.131031 | | 0.153974669 | | | 0.167269 | | | 0.158619 | | 0.131482 |
| sub29 | 0.160925 | | 0.168049 | | 0.208933684 | | | 0.23714 | | | 0.241903 | | 0.209139 |
| sub30 | 0.135552 | | 0.130368 | | 0.173898861 | | | 0.199547 | | | 0.199509 | | 0.175081 |
| sub31 | 0.184977 | | 0.204421 | | 0.255686066 | | | 0.282185 | | | 0.268994 | | 0.226754 |
| sub32 | 0.23491 | | 0.256535 | | 0.303274197 | | | 0.335364 | | | 0.329474 | | 0.273591 |
| sub33 | 0.156196 | | 0.158056 | | 0.207572654 | | | 0.247107 | | | 0.247525 | | 0.211714 |
| sub34 | 0.239211 | | 0.267792 | | 0.326581982 | | | 0.372483 | | | 0.351998 | | 0.291231 |
| sub35 | 0.179126 | | 0.186419 | | 0.223023769 | | | 0.263836 | | | 0.264085 | | 0.221818 |
| sub36 | 0.158978 | | 0.144291 | | 0.188862868 | | | 0.245828 | | | 0.256984 | | 0.226477 |
| sub37 | 0.218422 | | 0.226552 | | 0.276209711 | | | 0.33398 | | | 0.327095 | | 0.272975 |
| sub38 | 0.175975 | | 0.174495 | | 0.222597699 | | | 0.279215 | | | 0.281616 | | 0.238449 |
| sub39 | 0.232357 | | 0.223012 | | 0.261038571 | | | 0.302647 | | | 0.309715 | | 0.284305 |
| sub40 | 0.178729 | | 0.173864 | | 0.207022121 | | | 0.241368 | | | 0.245476 | | 0.221074 |
| sub41 | 0.150415 | | 0.150668 | | 0.200760303 | | | 0.231877 | | | 0.230587 | | 0.190392 |
| sub42 | 0.137922 | | 0.144103 | | 0.191808148 | | | 0.222914 | | | 0.221263 | | 0.187239 |
| sub43 | 0.167726 | | 0.16469 | | 0.209659376 | | | 0.246585 | | | 0.249715 | | 0.217827 |
| sub44 | 0.225292 | | 0.238784 | | 0.273508899 | | | 0.301376 | | | 0.30172 | | 0.2655 |
| sub45 | 0.201681 | | 0.213387 | | 0.270459249 | | | 0.312055 | | | 0.312096 | | 0.271638 |
| EROI in PC | | | | | | | | | | | | | |
| sub1 | 0.165504 | | 0.167248 | | 0.206093538 | | | 0.228876 | | | 0.224049 | | 0.196281 |
| sub2 | 0.177001 | | 0.182724 | | 0.20857245 | | | 0.230483 | | | 0.22918 | | 0.20456 |
| sub3 | 0.150571 | | 0.15369 | | 0.191990336 | | | 0.222643 | | | 0.221522 | | 0.190321 |
| sub4 | 0.286738 | | 0.303203 | | 0.361241577 | | | 0.400138 | | | 0.390669 | | 0.3381 |
| sub5 | 0.258128 | | 0.269974 | | 0.290638795 | | | 0.308203 | | | 0.313942 | | 0.292115 |
| sub6 | 0.19481 | | 0.207405 | | 0.234061937 | | | 0.250109 | | | 0.244772 | | 0.220895 |
| sub7 | 0.091377 | | 0.090971 | | 0.123210376 | | | 0.147805 | | | 0.149838 | | 0.125395 |
| sub8 | 0.202607 | | 0.195743 | | 0.232365322 | | | 0.271504 | | | 0.279628 | | 0.25572 |
| sub9 | 0.269517 | | 0.283536 | | 0.314770634 | | | 0.344686 | | | 0.338658 | | 0.309381 |
| sub10 | 0.132562 | | 0.134158 | | 0.184445368 | | | 0.218869 | | | 0.220032 | | 0.175173 |
| sub11 | 0.265142 | | 0.265273 | | 0.293500353 | | | 0.325983 | | | 0.326881 | | 0.298013 |
| sub12 | 0.226408 | | 0.248271 | | 0.313830216 | | | 0.357844 | | | 0.3438 | | 0.293445 |
| sub13 | 0.194121 | | 0.211659 | | 0.243768571 | | | 0.266328 | | | 0.258912 | | 0.229716 |
| sub14 | 0.220593 | | 0.227749 | | 0.256252075 | | | 0.279643 | | | 0.279661 | | 0.258668 |
| sub15 | 0.356105 | | 0.372709 | | 0.417822124 | | | 0.452586 | | | 0.44781 | | 0.407901 |
| sub16 | 0.143577 | | 0.151392 | | 0.189328681 | | | 0.221506 | | | 0.224474 | | 0.188276 |
| sub17 | 0.26693 | | 0.239553 | | 0.276728999 | | | 0.330379 | | | 0.344137 | | 0.321816 |
| sub18 | 0.202279 | | 0.225415 | | 0.259155829 | | | 0.285658 | | | 0.272953 | | 0.229214 |
| sub19 | 0.240947 | | 0.275402 | | 0.321749126 | | | 0.34333 | | | 0.32651 | | 0.281783 |
| sub20 | 0.204892 | | 0.223017 | | 0.272162838 | | | 0.306218 | | | 0.297761 | | 0.253606 |
| sub21 | 0.144626 | | 0.149905 | | 0.17819095 | | | 0.195235 | | | 0.190005 | | 0.168468 |
| sub22 | 0.122736 | | 0.137407 | | 0.167342681 | | | 0.18266 | | | 0.172185 | | 0.14564 |
| sub23 | 0.222367 | | 0.240763 | | 0.273204606 | | | 0.302595 | | | 0.293455 | | 0.258057 |
| sub24 | 0.238625 | | 0.26354 | | 0.302926343 | | | 0.32514 | | | 0.311536 | | 0.273356 |
| sub25 | 0.271915 | | 0.253423 | | 0.285848529 | | | 0.338932 | | | 0.354991 | | 0.325661 |
| sub26 | 0.213558 | | 0.209927 | | 0.245311035 | | | 0.279722 | | | 0.280875 | | 0.257371 |
| sub27 | 0.252766 | | 0.245167 | | 0.288930901 | | | 0.335155 | | | 0.338841 | | 0.303662 |
| sub28 | 0.123684 | | 0.142952 | | 0.166198247 | | | 0.180902 | | | 0.172025 | | 0.143853 |
| sub29 | 0.187193 | | 0.194819 | | 0.232164337 | | | 0.257866 | | | 0.25879 | | 0.227366 |
| sub30 | 0.166945 | | 0.16386 | | 0.202162164 | | | 0.227093 | | | 0.227523 | | 0.203354 |
| sub31 | 0.236392 | | 0.258466 | | 0.304039738 | | | 0.330152 | | | 0.309776 | | 0.262801 |
| sub32 | 0.255707 | | 0.279419 | | 0.33520146 | | | 0.375178 | | | 0.366543 | | 0.298993 |
| sub33 | 0.184587 | | 0.185326 | | 0.23080283 | | | 0.269566 | | | 0.270185 | | 0.235835 |
| sub34 | 0.264317 | | 0.298846 | | 0.366602055 | | | 0.417858 | | | 0.390443 | | 0.319004 |
| sub35 | 0.209138 | | 0.209712 | | 0.241572206 | | | 0.285798 | | | 0.290429 | | 0.249863 |
| sub36 | 0.186443 | | 0.166044 | | 0.208325332 | | | 0.270907 | | | 0.286611 | | 0.257062 |
| sub37 | 0.239391 | | 0.246681 | | 0.295637879 | | | 0.354079 | | | 0.347695 | | 0.293559 |
| sub38 | 0.198543 | | 0.199401 | | 0.248663153 | | | 0.304833 | | | 0.302773 | | 0.2562 |
| sub39 | 0.277105 | | 0.25688 | | 0.28378271 | | | 0.327938 | | | 0.343882 | | 0.32768 |
| sub40 | 0.200657 | | 0.192274 | | 0.221541193 | | | 0.259047 | | | 0.265589 | | 0.242343 |
| sub41 | 0.168827 | | 0.169922 | | 0.219249485 | | | 0.24932 | | | 0.245799 | | 0.205561 |
| sub42 | 0.170198 | | 0.174374 | | 0.213403285 | | | 0.24174 | | | 0.242389 | | 0.212882 |
| sub43 | 0.185019 | | 0.182298 | | 0.228247576 | | | 0.267253 | | | 0.271252 | | 0.237447 |
| sub44 | 0.28044 | | 0.286891 | | 0.311150632 | | | 0.33333 | | | 0.33844 | | 0.311041 |
| sub45 | 0.228749 | | 0.240937 | | 0.303774571 | | | 0.352034 | | | 0.352029 | | 0.30549 |

Table S5. Summary of the patients’ clinical characteristic data.

|  | | DLPFC | | | | AG | | | |
| --- | --- | --- | --- | --- | --- | --- | --- | --- | --- |
|  | | before | after | *P* value | CV (%) | before | after | *P* value | CV (%) |
| Gender (M:F) | | 11:19 | / | / | / | 8:7 | / | / | / |
| Age | | 68.70±6.86 | / | / | / | 74.67±5.70 | / | / | / |
| Education | | 11.57±3.61 | / | / | / | 10.47±2.90 | / | / | / |
| Years of disease | | 2.10±2.10 | / | / | / | 4.00±1.69 | / | / | / |
| MMSE | | 26.57±2.88 | 27.63±2.50 | 0.004b | 166.86 | 20.89±2.92 | 21.93±3.03 | 0.030b | 164.17 |
| MoCA | | 22.13±4.31 | 24.17±4.56 | 0.002b | 166.14 | 16.93±3.43 | 18.67±3.18 | 0.005b | 101.03 |
| GDS | | 5.83±3.38 | 5.83±3.49 | 0.948b | / | / | / | / | / |
| Face-word Stroop Task | | 6.17±4.32 | 8.57±5.07 | 0.000a | 136.05 | / | / | / | / |
| AVLT1 | | 5.13±2.11 | 6.90±3.29 | 0.003b | 157.09 | / | / | / | / |
| AVLT2 | | 7.03±2.91 | 8.97±3.48 | 0.000a | 130.95 | / | / | / | / |
| AVLT3 | | 8.67±3.13 | 10.27±3.27 | 0.000a | 135.94 | / | / | / | / |
| AVLT_delay | | 6.43±4.06 | 8.27±4.76 | 0.000b | 153.67 | / | / | / | / |
| AVLT_clue | | 7.93±4.04 | 9.10±4.16 | 0.016a | 213.64 | / | / | / | / |
| AVLT_recognition | | 8.90±4.21 | 10.53±3.00 | 0.006a | 185.06 | / | / | / | / |
| AVLT_all | | 20.83±7.58 | 26.13±9.50 | 0.000a | 114.84 | / | / | / | / |
| CDT | | / | / | / | / | 20.07±7.37 | 21.73±7.89 | 0.056b | / |
| ADAS-Cog | | / | / | / | / | 18.80±6.67 | 15.20±6.52 | 0.000b | 34.50 |
| SCWT | A time | / | / | / | / | 49.47±25.76 | 47.80±27.62 | 0.492b | / |
| A correct number | / | / | / | / | 49.80±0.41 | 49.67±1.05 | 1.000b | / |
| B time | / | / | / | / | 56.00±24.85 | 51.80±21.12 | 0.057b | / |
| B correct number | / | / | / | / | 49.13±1.51 | 49.47±1.13 | 0.617b | / |
| C time | / | / | / | / | 106.87±33.18 | 99.27±26.74 | 0.202a | / |
| C correct number | / | / | / | / | 41.40±7.44 | 45.33±3.93 | 0.027b | / |

Note. Measurement data are described as the mean ± standard deviation. Statistical analyses before and after treatment were performed using the paired t-test (a) and Wilcoxon test (b).

Abbreviations: MMSE, Mini-Mental State Examination; MOCA, Montreal Cognitive Assessment; GDS, Geriatric Depression Scale; AVLT, Auditory Verbal Learning Test; CDT, Clock Drawing Test; ADAS-Cog, Alzheimer’s Disease Assessment Scale-Cognitive; SCWT, Stroop Color and Word Test.

Table S6. Relationship between E-field components and clinical outcomes

|  | E⊥ | E*∥* | EWM | EGM | EROI |
| --- | --- | --- | --- | --- | --- |
| In the DLPFC group: *r* (*P*) | | | | | |
| MMSE | -0.045 (0.81) | -0.073 (0.70) | -0.11 (0.56) | -0.048 (0.80) | -0.073 (0.70) |
| MoCA | 0.254 (0.18) | -0.21 (0.27) | 0.10 (0.59) | 0.008 (0.97) | 0.004 (0.98) |
| GDS | 0.19 (0.32) | -0.096 (0.61) | 0.11 (0.56) | 0.080 (0.68) | 0.092 (0.63) |
| Face-word Stroop Task | 0.26 (0.17) | 0.21 (0.27) | 0.27 (0.14) | 0.37* (**0.044**) | 0.36 (0.049) |
| AVLT1 | 0.18 (0.34) | 0.23 (0.23) | 0.23 (0.22) | 0.30 (0.11) | 0.30 (0.10) |
| AVLT2 | 0.36 (0.053) | 0.17 (0.39) | 0.30 (0.11) | 0.34 (0.065) | 0.36 (0.055) |
| AVLT3 | 0.51** (**0.004**) | 0.15 (0.43) | 0.54** (**0.002**) | 0.43* (**0.019**) | 0.48** (**0.007**) |
| AVLT_delay | 0.23 (0.23) | 0.014 (0.94) | 0.15 (0.44) | 0.17 (0.37) | 0.16 (0.41) |
| AVLT_clue | 0.24 (0.21) | -0.067 (0.72) | 0.11 (0.57) | 0.092 (0.63) | 0.10 (0.59) |
| AVLT_recognition | 0.047 (0.81) | -0.032 (0.87) | 0.17 (0.36) | 0.021 (0.91) | 0.042 (0.83) |
| AVLT_all | 0.41* (**0.024**) | 0.23 (0.23) | 0.42* (**0.020**) | 0.43* (**0.018**) | 0.46** (**0.011**) |
| In the AG group: *r* (*P*) | | | | | |
| MMSE | 0.28 (0.32) | -0.006 (0.98) | 0.25 (0.38) | 0.19 (0.50) | 0.21 (0.46) |
| MoCA | 0.15 (0.59) | -0.37 (0.17) | -0.064 (0.82) | -0.31 (0.26) | -0.12 (0.66) |
| CDT | 0.18 (0.51) | -0.32 (0.25) | 0.21 (0.46) | -0.23 (0.42) | -0.045 (0.87) |
| ADAS-Cog | -0.20 (0.48) | -0.20 (0.49) | -0.34 (0.22) | -0.32 (0.25) | -0.37 (0.18) |

Table S7. Grouping individualized optimal coil orientation in the DLPFC group

| Score type | Subgroup (E⊥) | Score changes (E⊥) | *t* (*P*) | Subgroup (EWM) | Score changes (EWM) | *t* (*P*) |
| --- | --- | --- | --- | --- | --- | --- |
| AVLT3 | 1 | 2.19±2.69 | 1.63 (0.12) | 3 | 2.29±2.64 | 2.12 (**0.043**) |
| 2 | 0.93±1.14 | 4 | 0.69±0.75 |
| AVLT_all | 1 | 6.50±7.21 | 1.16 (0.26) | 3 | 7.00±7.04 | 1.82 (0.080) |
| 2 | 3.93±4.34 | 4 | 3.08±3.75 |

**Figure S1.**


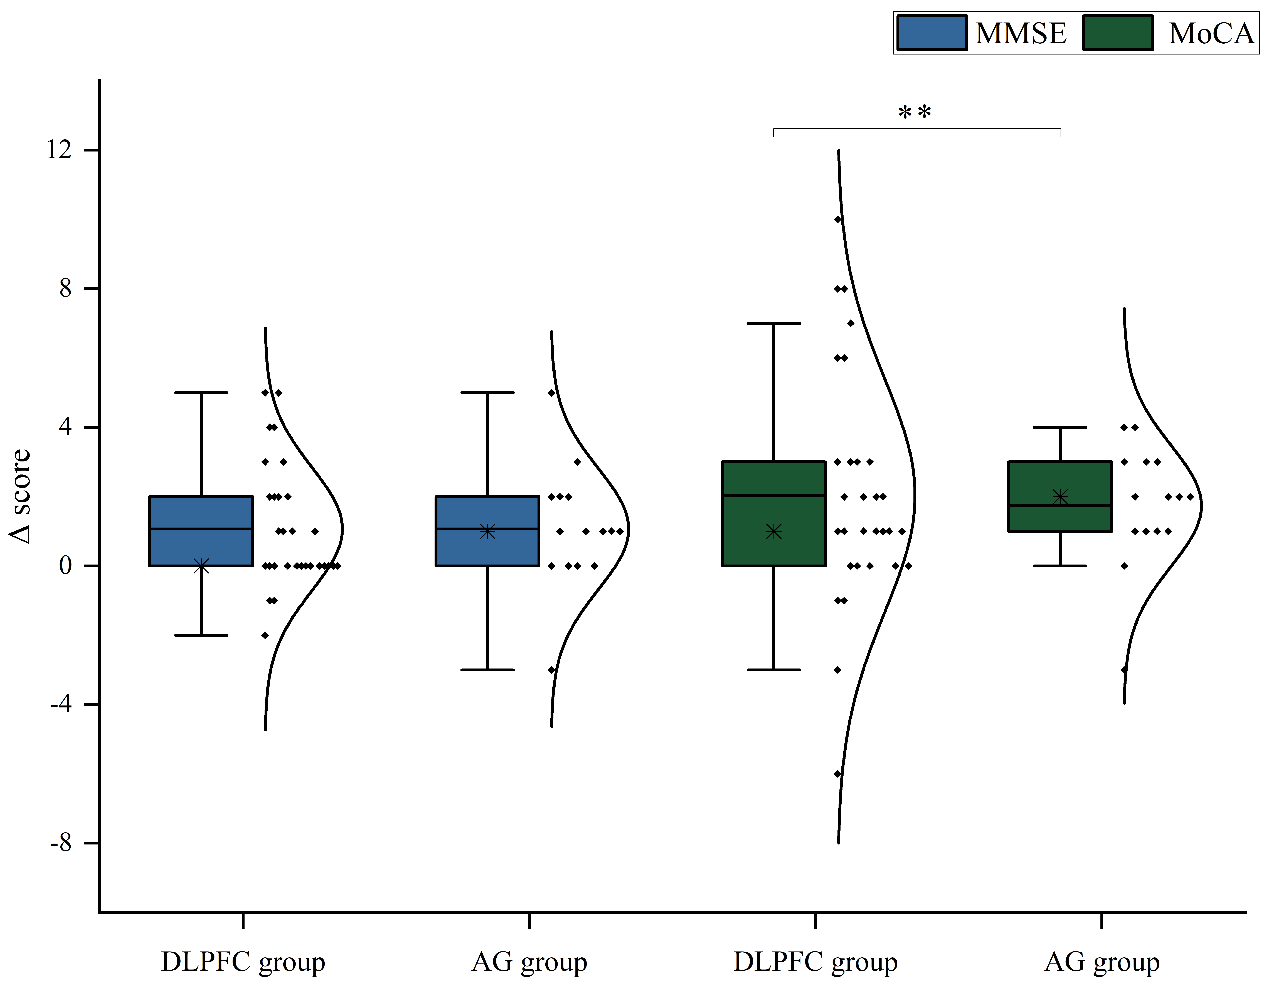


Fig. S1. For the DLPFC and AG groups, both the MMSE and MoCA showed greater CV in the DLPFC group. The CV between the two groups were significant for MoCA, with *P*=0.006.
